# Supplementary material for: Cyclonerane Derivatives from the Algicolous Endophytic Fungus Trichoderma asperellum A-YMD-9-2
Source: PubMed Central journal article supplement (PMC6562392; doi:10.3390/md17050252), 2019-04-28
Supplement: marinedrugs-17-00252-s001.pdf [file marinedrugs-17-00252-s001.pdf]

# Supplementary Materials

## Cyclonerane Derivatives from the Algicolous Endophytic Fungus *Trichoderma asperellum* A-YMD-9-2

Yin-Ping Song<sup>1,2,3</sup>, Feng-Ping Miao<sup>1,3</sup>, Xiang-Hong Liu<sup>1,2,3</sup>, Xiu-Li Yin<sup>1,3</sup> and Nai-Yun Ji<sup>1,3,\*</sup>

<sup>1</sup> Yantai Institute of Coastal Zone Research, Chinese Academy of Sciences, Yantai 264003, People's Republic of China; ypsong@yic.ac.cn (Y.-P.S.); fpmiao@yic.ac.cn (F.-P.M.); xianghongliu@yic.ac.cn (X.-H.L.); xlyin@yic.ac.cn@yic.ac.cn (X.-L.Y.)

<sup>2</sup> University of Chinese Academy of Sciences, Beijing 100049, People's Republic of China

<sup>3</sup> Center for Ocean Mega-Science, Chinese Academy of Sciences, Qingdao 266071, People's Republic of China

\* Correspondence: nyji@yic.ac.cn; Tel.: +86-535-210-9176

## Contents

- Figure S1.**  $^1\text{H}$  NMR spectrum of compound **1** in  $\text{CDCl}_3$ .
- Figure S2.**  $^{13}\text{C}$  NMR and DEPT spectra of compound **1** in  $\text{CDCl}_3$ .
- Figure S3.** HSQC spectrum of compound **1** in  $\text{CDCl}_3$ .
- Figure S4.** HMBC spectrum of compound **1** in  $\text{CDCl}_3$ .
- Figure S5.** COSY spectrum of compound **1** in  $\text{CDCl}_3$ .
- Figure S6.** NOESY spectrum of compound **1** in  $\text{CDCl}_3$ .
- Figure S7.** HREIMS spectrum of compound **1**.
- Figure S8.**  $^1\text{H}$  NMR spectrum of compound **2** in  $\text{CDCl}_3$ .
- Figure S9.**  $^{13}\text{C}$  NMR and DEPT spectra of compound **2** in  $\text{CDCl}_3$ .
- Figure S10.** HSQC spectrum of compound **2** in  $\text{CDCl}_3$ .
- Figure S11.** HMBC spectrum of compound **2** in  $\text{CDCl}_3$ .
- Figure S12.** COSY spectrum of compound **2** in  $\text{CDCl}_3$ .
- Figure S13.** NOESY spectrum of compound **2** in  $\text{CDCl}_3$ .
- Figure S14.** HRESI<sup>+</sup>MS spectrum of compound **2**.
- Figure S15.**  $^1\text{H}$  NMR spectrum of compound **3** in  $\text{CDCl}_3$ .
- Figure S16.**  $^{13}\text{C}$  NMR and DEPT spectra of compound **3** in  $\text{CDCl}_3$ .
- Figure S17.** HSQC spectrum of compound **3** in  $\text{CDCl}_3$ .
- Figure S18.** HMBC spectrum of compound **3** in  $\text{CDCl}_3$ .
- Figure S19.** COSY spectrum of compound **3** in  $\text{CDCl}_3$ .
- Figure S20.** NOESY spectrum of compound **3** in  $\text{CDCl}_3$ .
- Figure S21.** HREIMS spectrum of compound **3**.
- Figure S22.**  $^1\text{H}$  NMR spectrum of compound **4** in  $\text{CDCl}_3$ .
- Figure S23.**  $^{13}\text{C}$  NMR and DEPT spectra of compound **4** in  $\text{CDCl}_3$ .
- Figure S24.** HSQC spectrum of compound **4** in  $\text{CDCl}_3$ .
- Figure S25.** HMBC spectrum of compound **4** in  $\text{CDCl}_3$ .
- Figure S26.** COSY spectrum of compound **4** in  $\text{CDCl}_3$ .
- Figure S27.** NOESY spectrum of compound **4** in  $\text{CDCl}_3$ .
- Figure S28.** HREIMS spectrum of compound **4**.
- Figure S29.**  $^1\text{H}$  NMR spectrum of compound **5** in  $\text{CDCl}_3$ .
- Figure S30.**  $^{13}\text{C}$  NMR and DEPT spectra of compound **5** in  $\text{CDCl}_3$ .
- Figure S31.** HSQC spectrum of compound **5** in  $\text{CDCl}_3$ .
- Figure S32.** HMBC spectrum of compound **5** in  $\text{CDCl}_3$ .

**Figure S33.** COSY spectrum of compound **5** in CDCl<sub>3</sub>.

**Figure S34.** NOESY spectrum of compound **5** in CDCl<sub>3</sub>.

**Figure S35.** HREIMS spectrum of compound **5**.

**Figure S36.** <sup>1</sup>H NMR spectrum of compound **6** in CDCl<sub>3</sub>.

**Figure S37.** <sup>13</sup>C NMR and DEPT spectra of compound **6** in CDCl<sub>3</sub>.

**Figure S38.** HSQC spectrum of compound **6** in CDCl<sub>3</sub>.

**Figure S39.** HMBC spectrum of compound **6** in CDCl<sub>3</sub>.

**Figure S40.** COSY spectrum of compound **6** in CDCl<sub>3</sub>.

**Figure S41.** NOESY spectrum of compound **6** in CDCl<sub>3</sub>.

**Figure S42.** HREIMS spectrum of compound **6**.

**Figure S43.** <sup>1</sup>H NMR spectrum of compound **7** in CDCl<sub>3</sub>.

**Figure S44.** <sup>13</sup>C NMR and DEPT spectra of compound **7** in CDCl<sub>3</sub>.

**Figure S45.** HSQC spectrum of compound **7** in CDCl<sub>3</sub>.

**Figure S46.** HMBC spectrum of compound **7** in CDCl<sub>3</sub>.

**Figure S47.** COSY spectrum of compound **7** in CDCl<sub>3</sub>.

**Figure S48.** NOESY spectrum of compound **7** in CDCl<sub>3</sub>.

**Figure S49.** HREIMS spectrum of compound **7**.

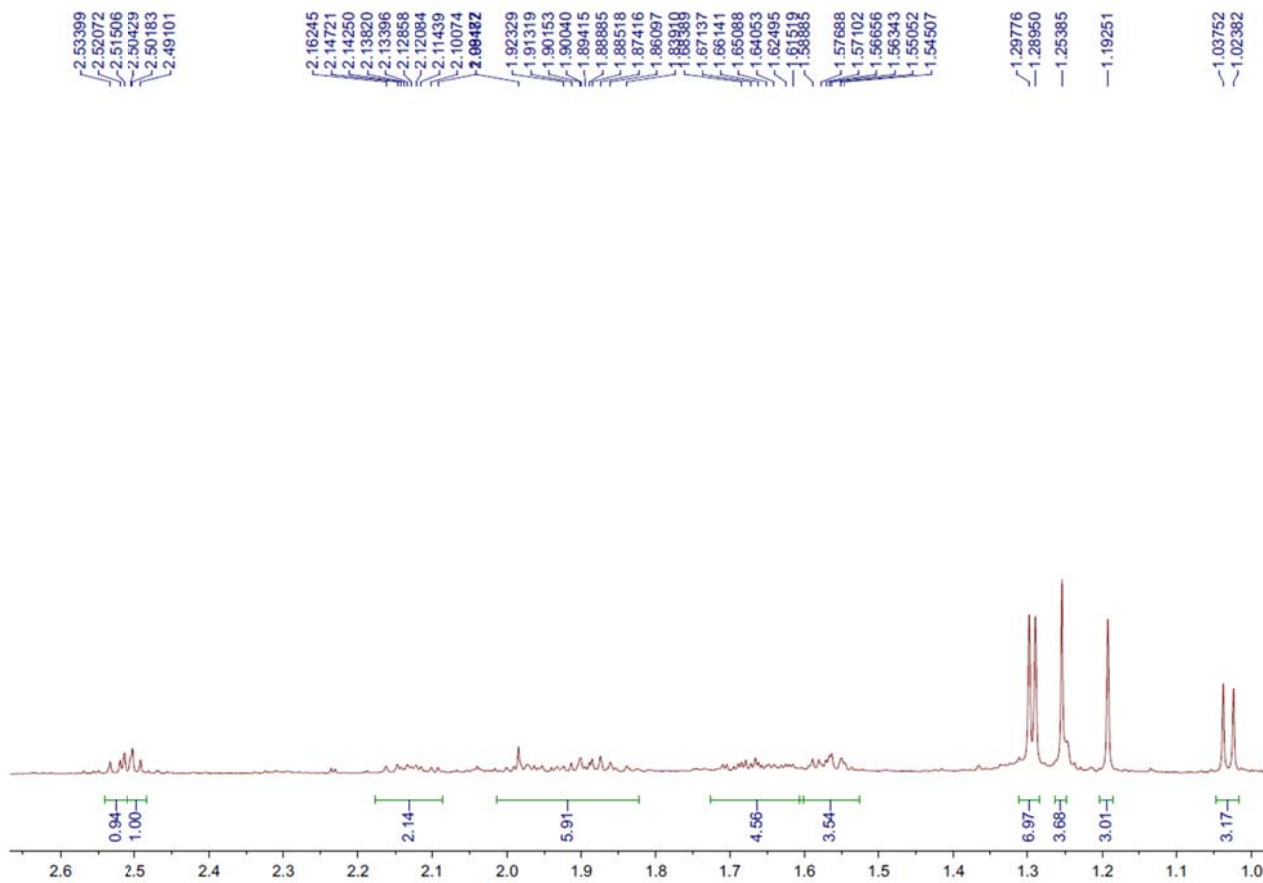

Figure S1.  $^1\text{H}$  NMR spectrum of compound **1** in  $\text{CDCl}_3$ .

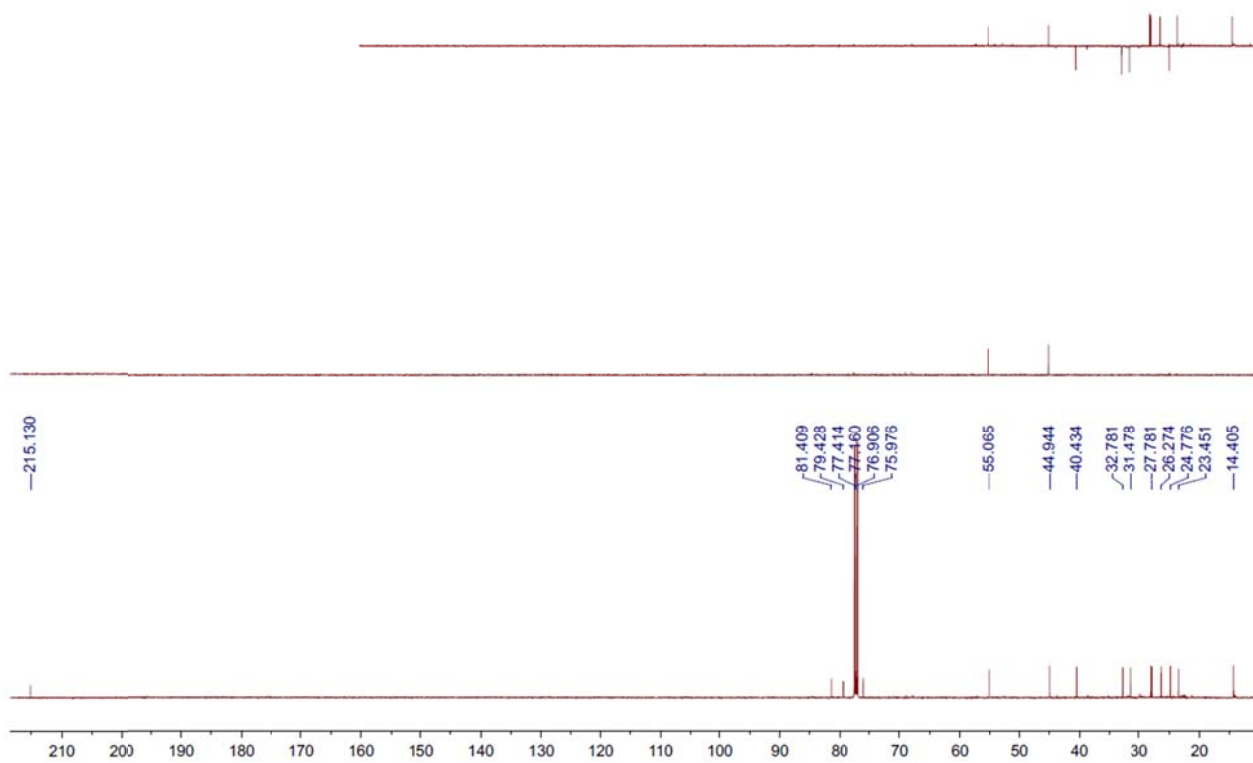

Figure S2.  $^{13}\text{C}$  NMR and DEPT spectra of compound **1** in  $\text{CDCl}_3$ .

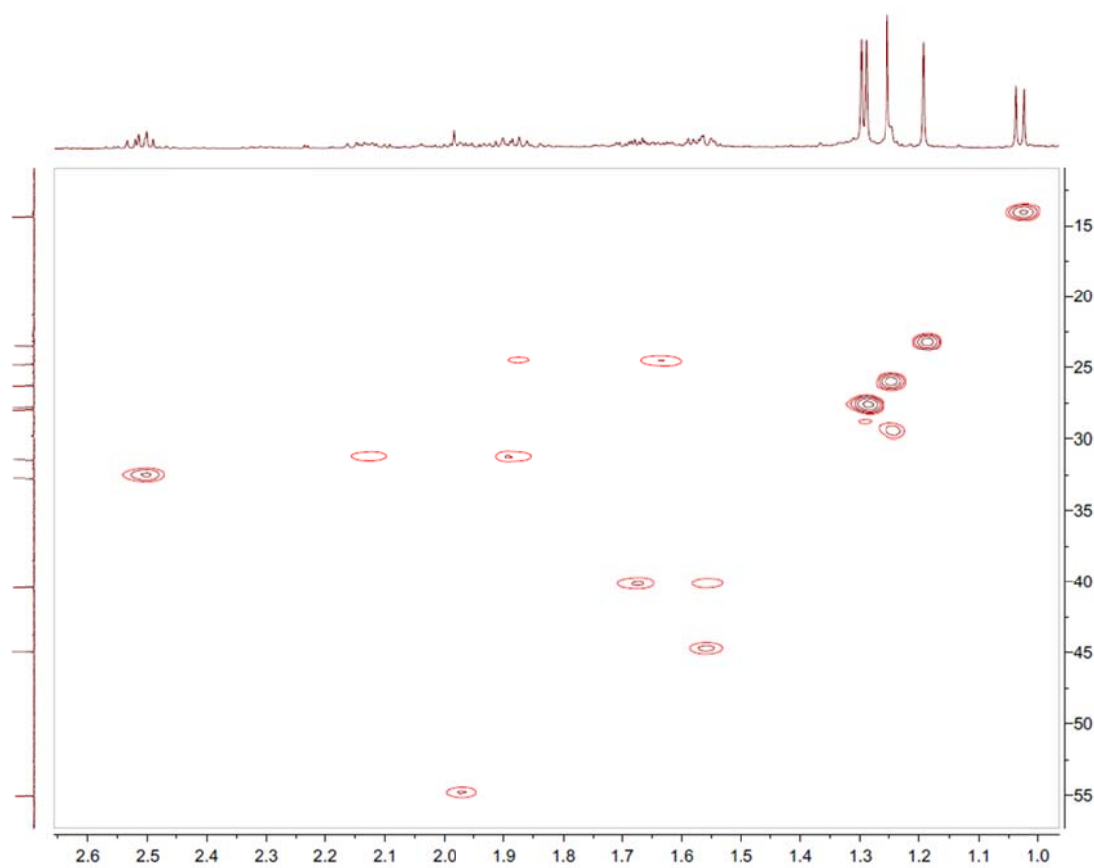

**Figure S3.** HSQC spectrum of compound **1** in CDCl<sub>3</sub>.

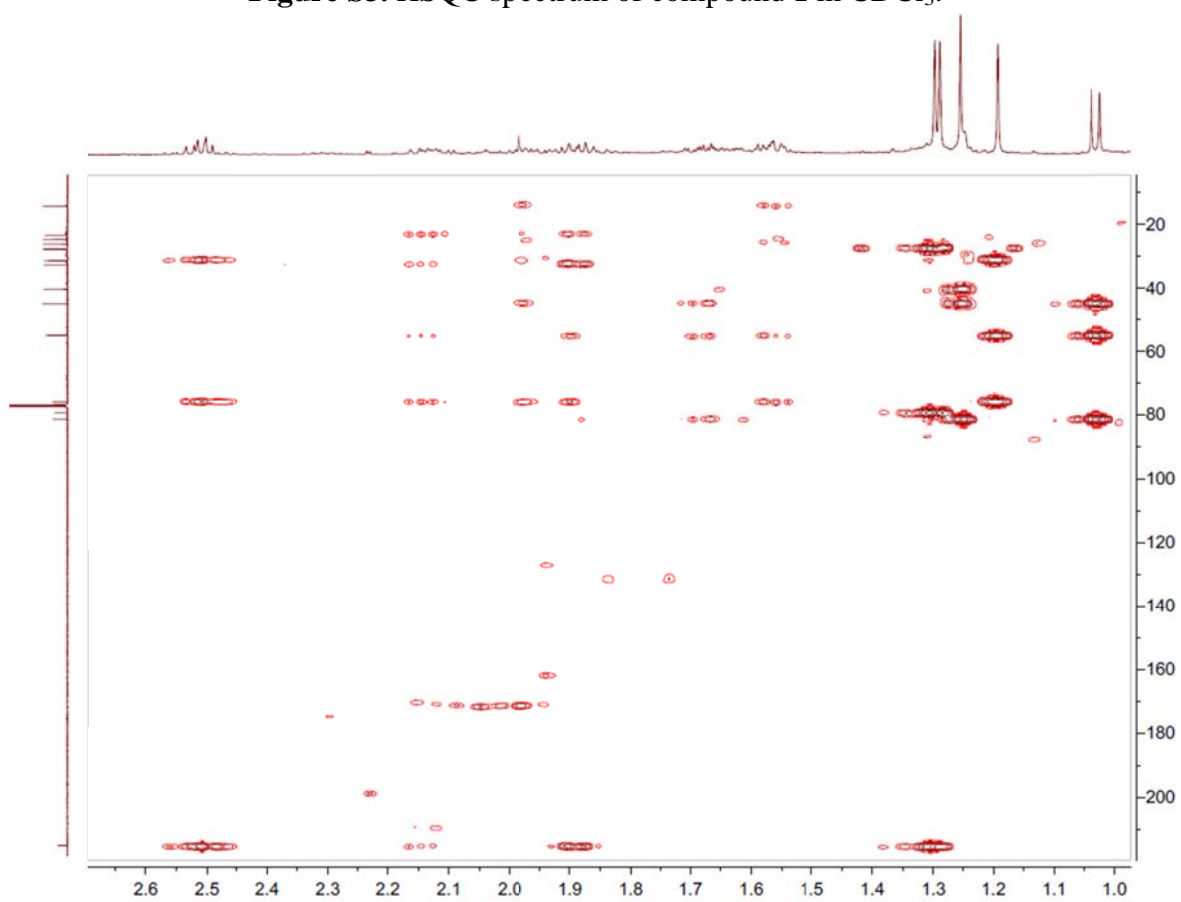

**Figure S4.** HMBC spectrum of compound **1** in CDCl<sub>3</sub>.

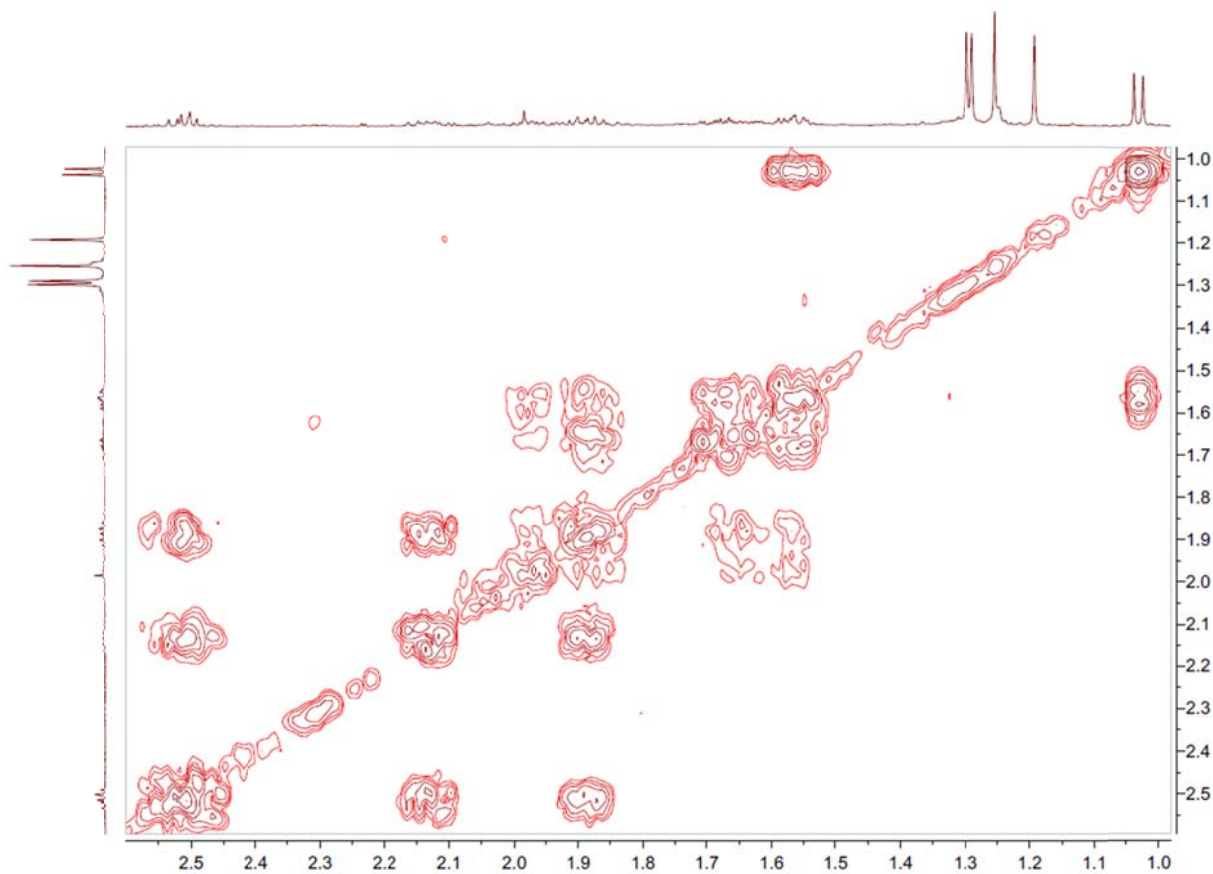

**Figure S5.** COSY spectrum of compound **1** in  $\text{CDCl}_3$ .

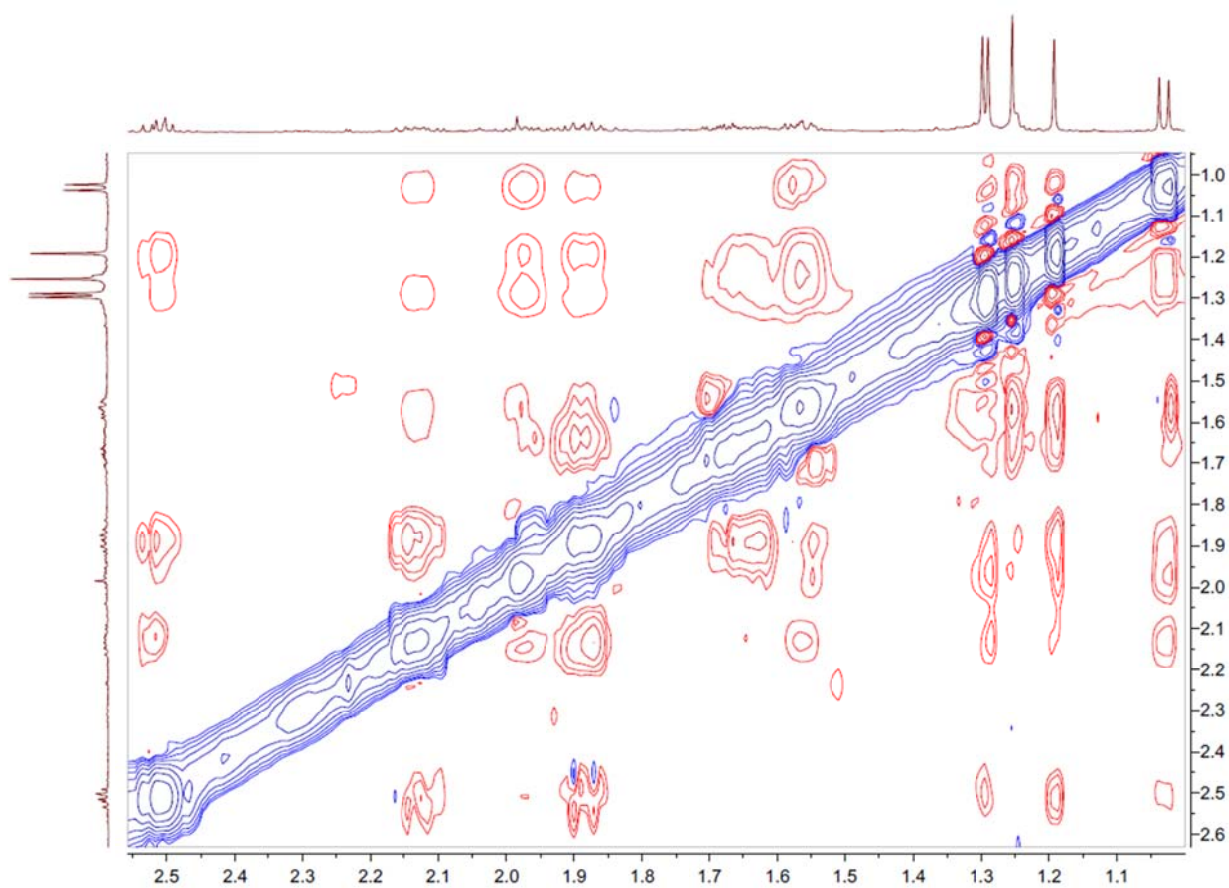

**Figure S6.** NOESY spectrum of compound **1** in  $\text{CDCl}_3$ .

### Single Mass Analysis

Tolerance = 10.0 PPM / DBE: min = -10.0, max = 120.0

Selected filters: None

Monoisotopic Mass, Odd and Even Electron Ions

20 formula(e) evaluated with 1 results within limits (up to 51 closest results for each mass)

Elements Used:

C: 0-200 H: 0-400 O: 2-5

09:35:38 20-Jun-2018

KIB  
M180612EA-08AFAMM 23 (2.112)  
272.1991

Autospec Premier  
P776  
2

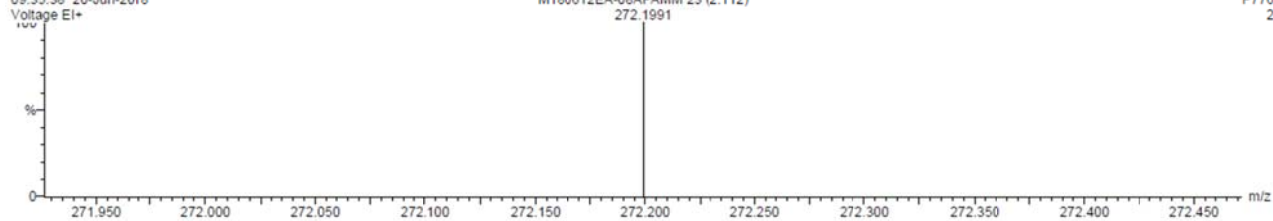

| Mass     | Calc. Mass | mDa | PPM | DBE | i-FIT     | Formula    |
|----------|------------|-----|-----|-----|-----------|------------|
| 272.1991 | 272.1988   | 0.3 | 1.1 | 2.0 | 5546025.5 | C15 H28 O4 |

Figure S7. HREIMS spectrum of compound 1.

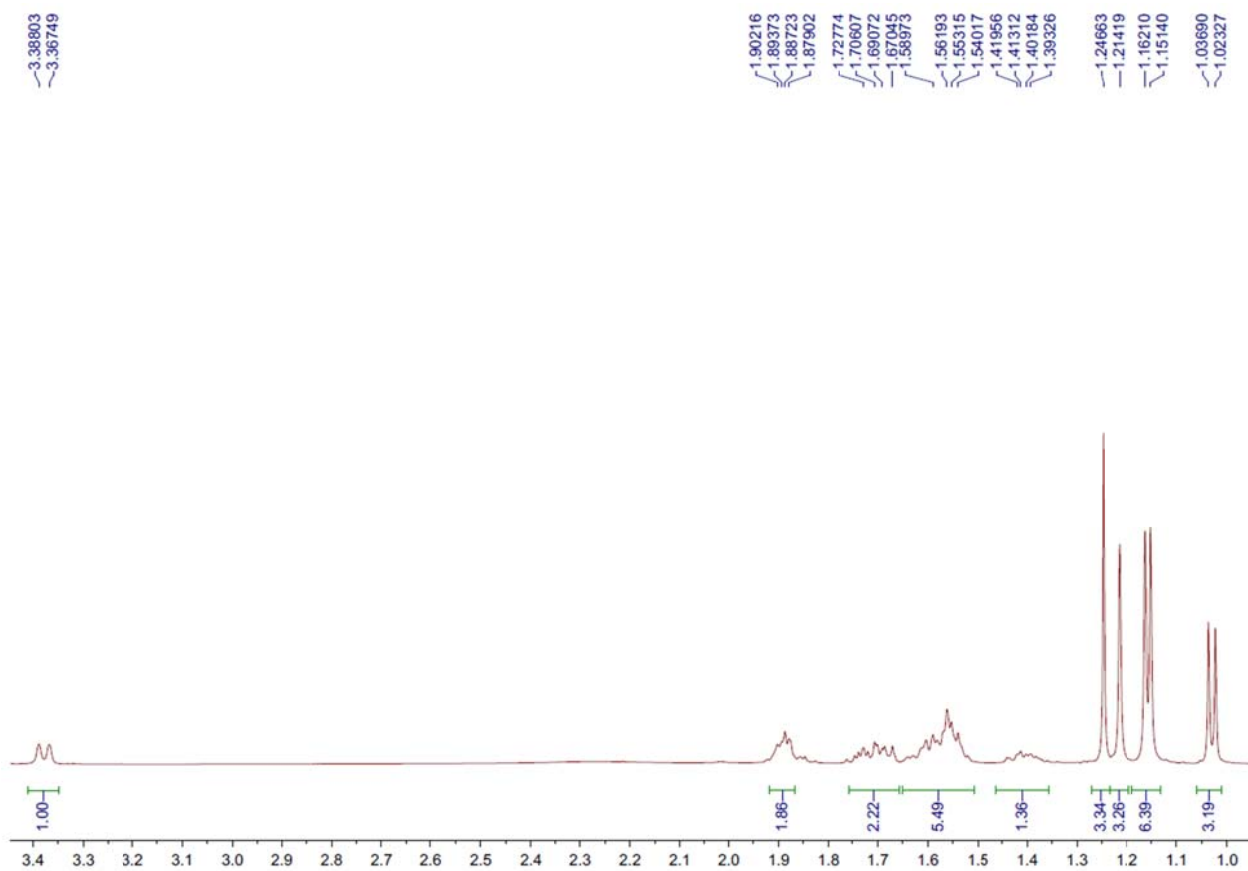

Figure S8. <sup>1</sup>H NMR spectrum of compound 2 in CDCl<sub>3</sub>.

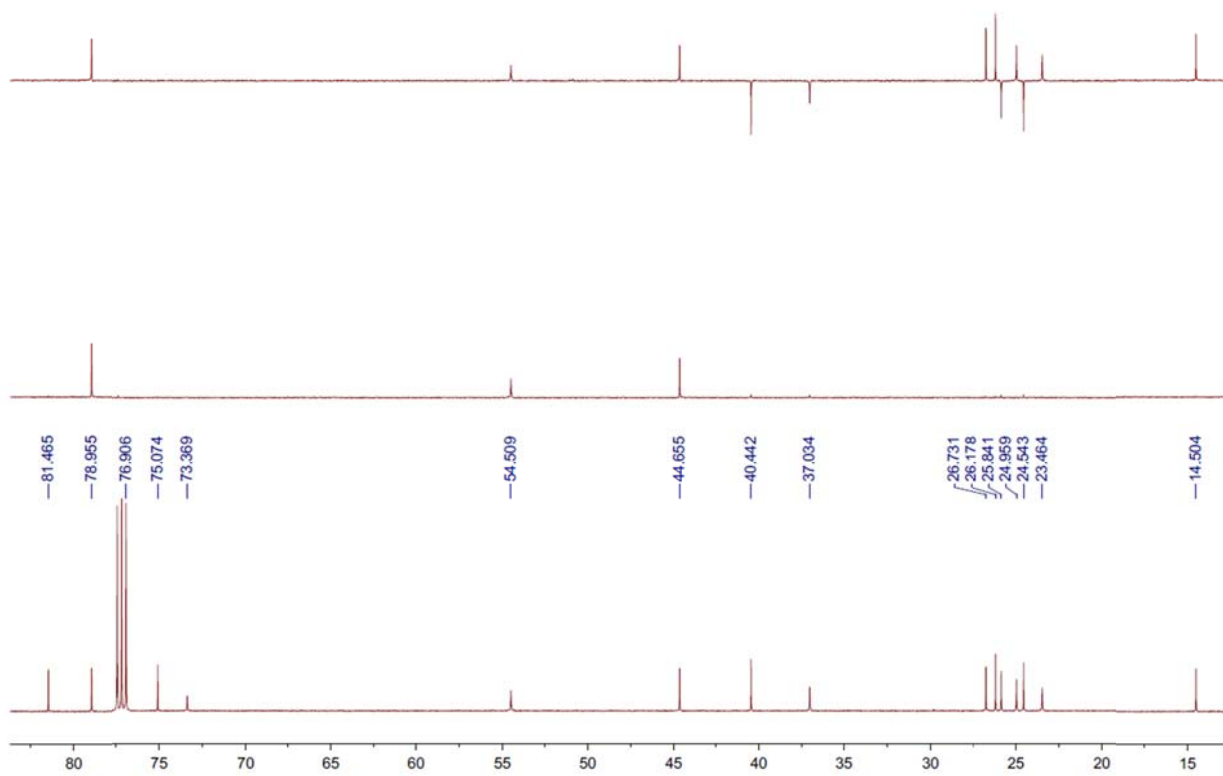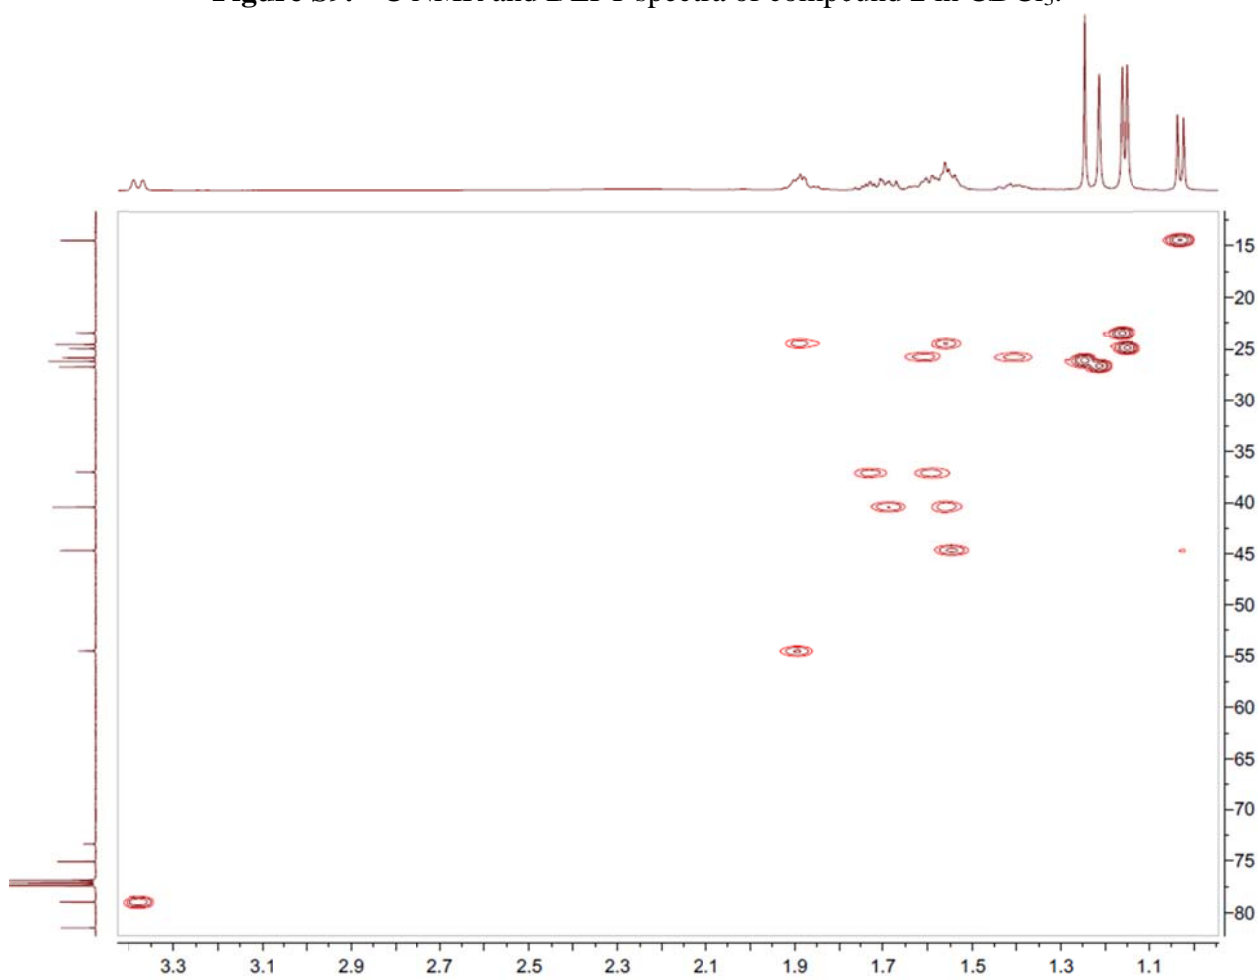



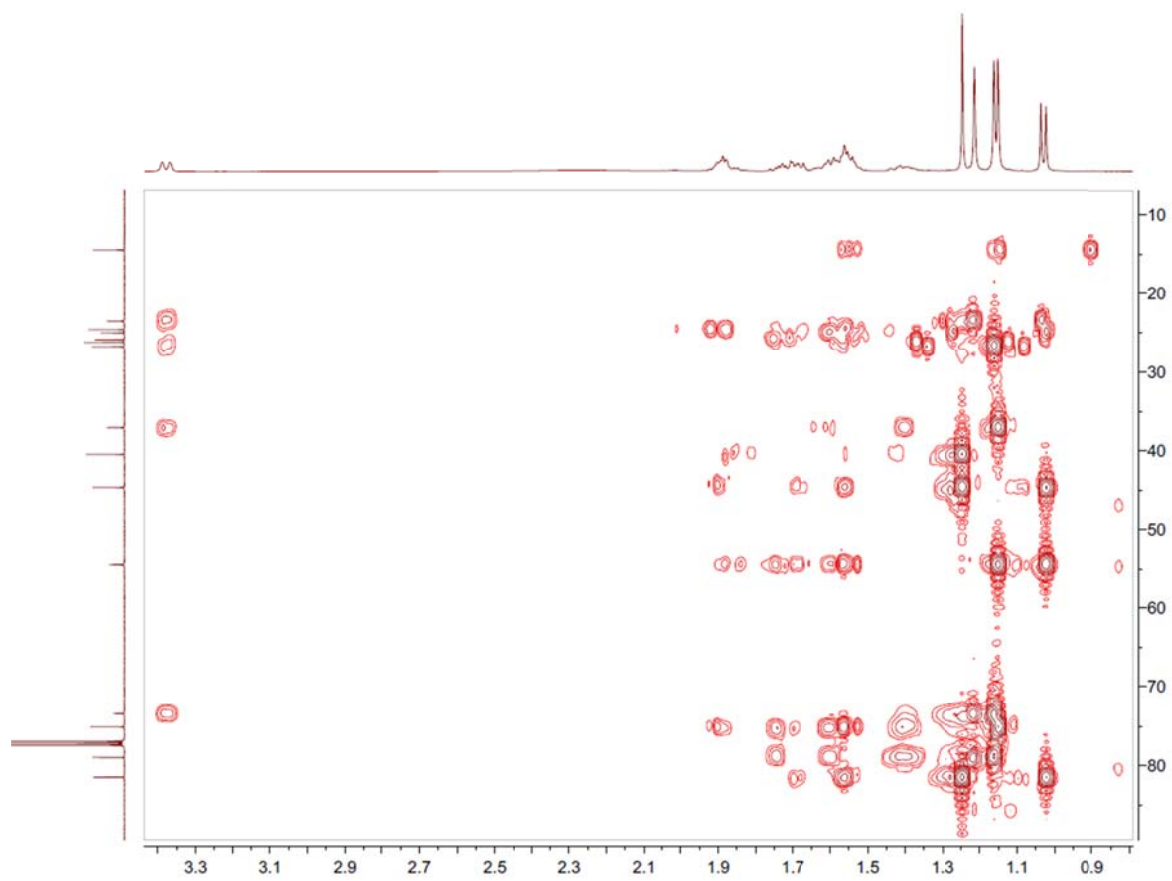

**Figure S11.** HMBC spectrum of compound **2** in CDCl<sub>3</sub>.

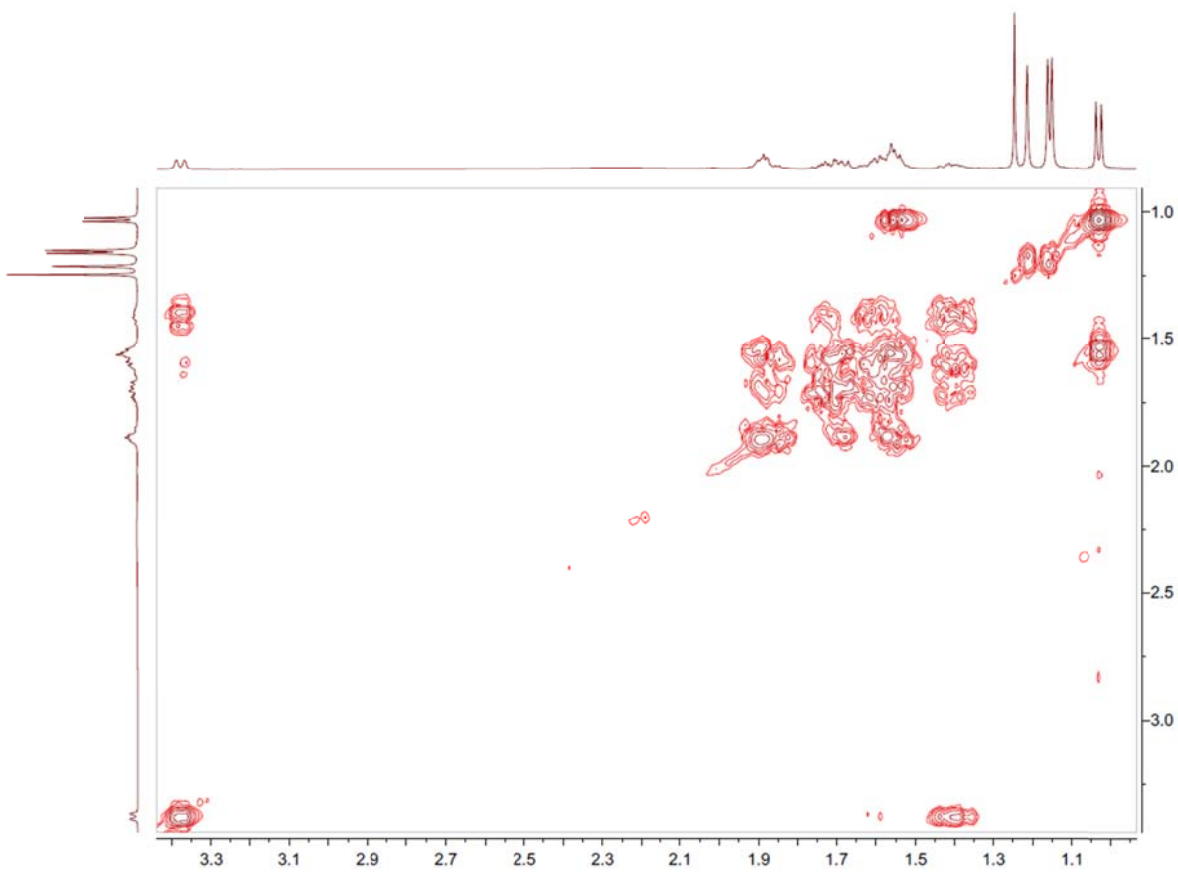

**Figure S12.** COSY spectrum of compound **2** in CDCl<sub>3</sub>.

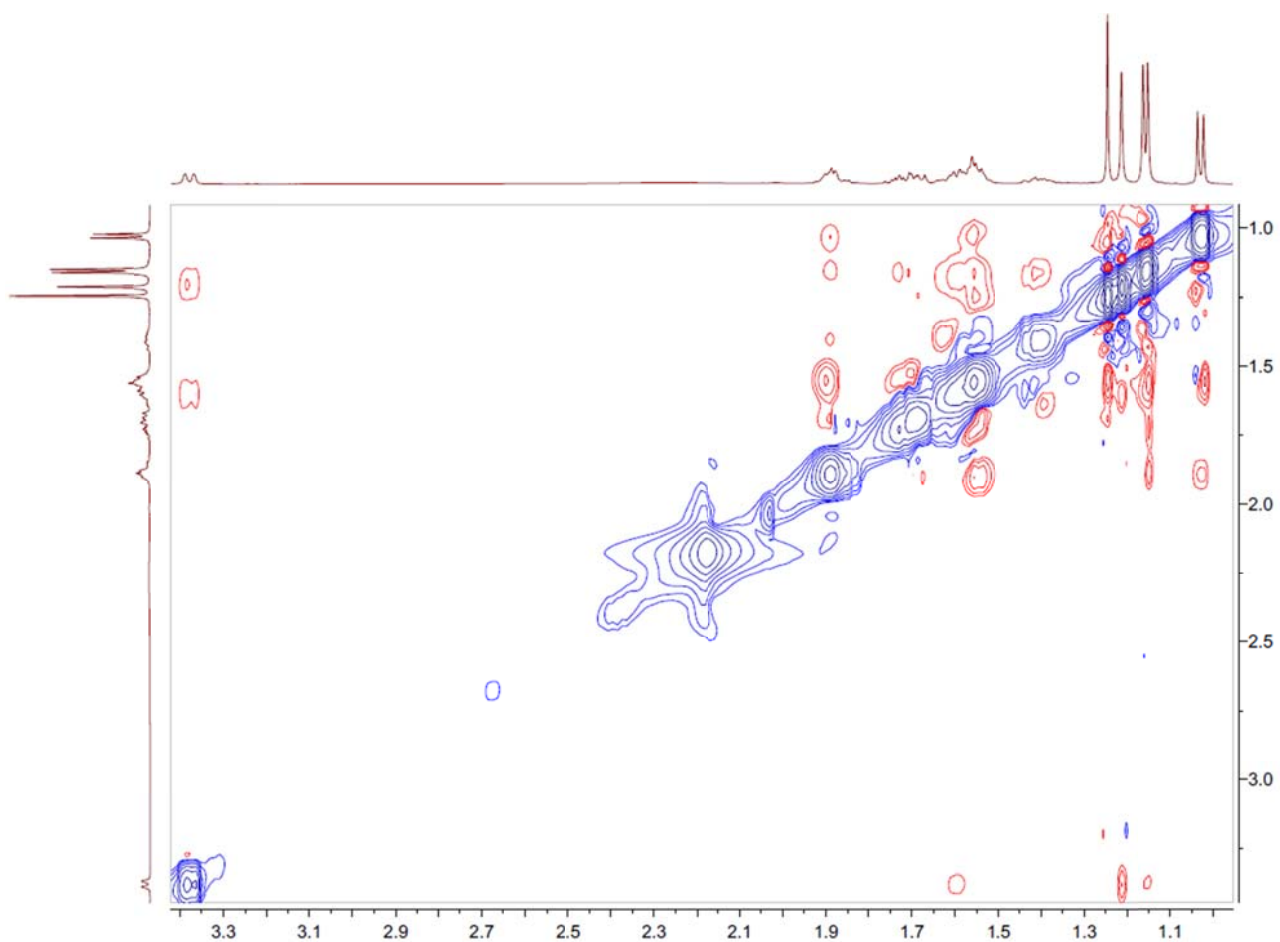

**Figure S13.** NOESY spectrum of compound **2** in  $\text{CDCl}_3$ .

## Qualitative Analysis Report

|                        |                      |               |                       |
|------------------------|----------------------|---------------|-----------------------|
| Data Filename          | 181121ESIA4.d        | Sample Name   | compound 2            |
| Sample Type            | Sample               | Position      |                       |
| Instrument Name        | Agilent G6230 TOF MS | User Name     | KIB                   |
| Acq Method             | ESI.m                | Acquired Time | 11/21/2018 9:39:20 AM |
| IRM Calibration Status | Success              | DA Method     | ESI.m                 |
| Comment                |                      |               |                       |

|                |                             |
|----------------|-----------------------------|
| Sample Group   | Info.                       |
| Acquisition SW | 6200 series TOF/6500 series |
| Version        | Q-TOF B.05.01 (B5125.2)     |

### User Spectra

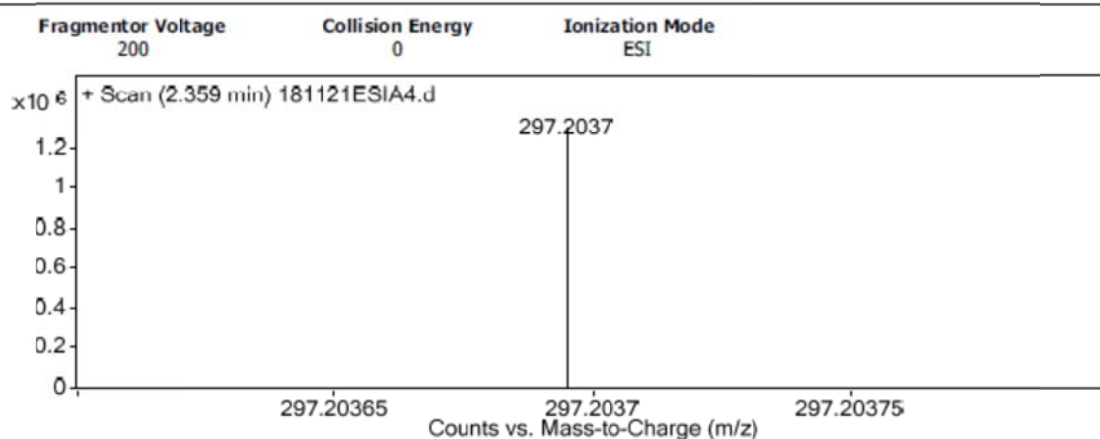

### Peak List

| m/z      | z | Abund      | Formula       | Ion |
|----------|---|------------|---------------|-----|
| 297.2037 | 1 | 1295062.75 | C15 H30 Na O4 | M+  |
| 298.2073 | 1 | 196830.22  | C15 H30 Na O4 | M+  |
| 310.1265 | 1 | 172631.41  |               |     |
| 322.1268 | 1 | 651617.13  |               |     |
| 338.2304 | 1 | 159140.7   |               |     |
| 344.1088 | 1 | 166444.25  |               |     |
| 571.4188 | 1 | 1124473.88 |               |     |
| 572.4223 | 1 | 360450.06  |               |     |
| 575.356  | 1 | 156204.05  |               |     |
| 687.4812 | 1 | 189309.59  |               |     |

### Formula Calculator Element Limits

| Element | Min | Max |
|---------|-----|-----|
| C       | 0   | 200 |
| H       | 0   | 400 |
| O       | 0   | 10  |
| Na      | 1   | 1   |

### Formula Calculator Results

| Formula       | CalculatedMass | Mz       | Diff.(mDa) | Diff. (ppm) | DBE |
|---------------|----------------|----------|------------|-------------|-----|
| C15 H30 Na O4 | 297.2042       | 297.2037 | 0.5        | 1.6         | 0.5 |

--- End Of Report ---

**Figure S14.** HREST<sup>+</sup>MS spectrum of compound 2.

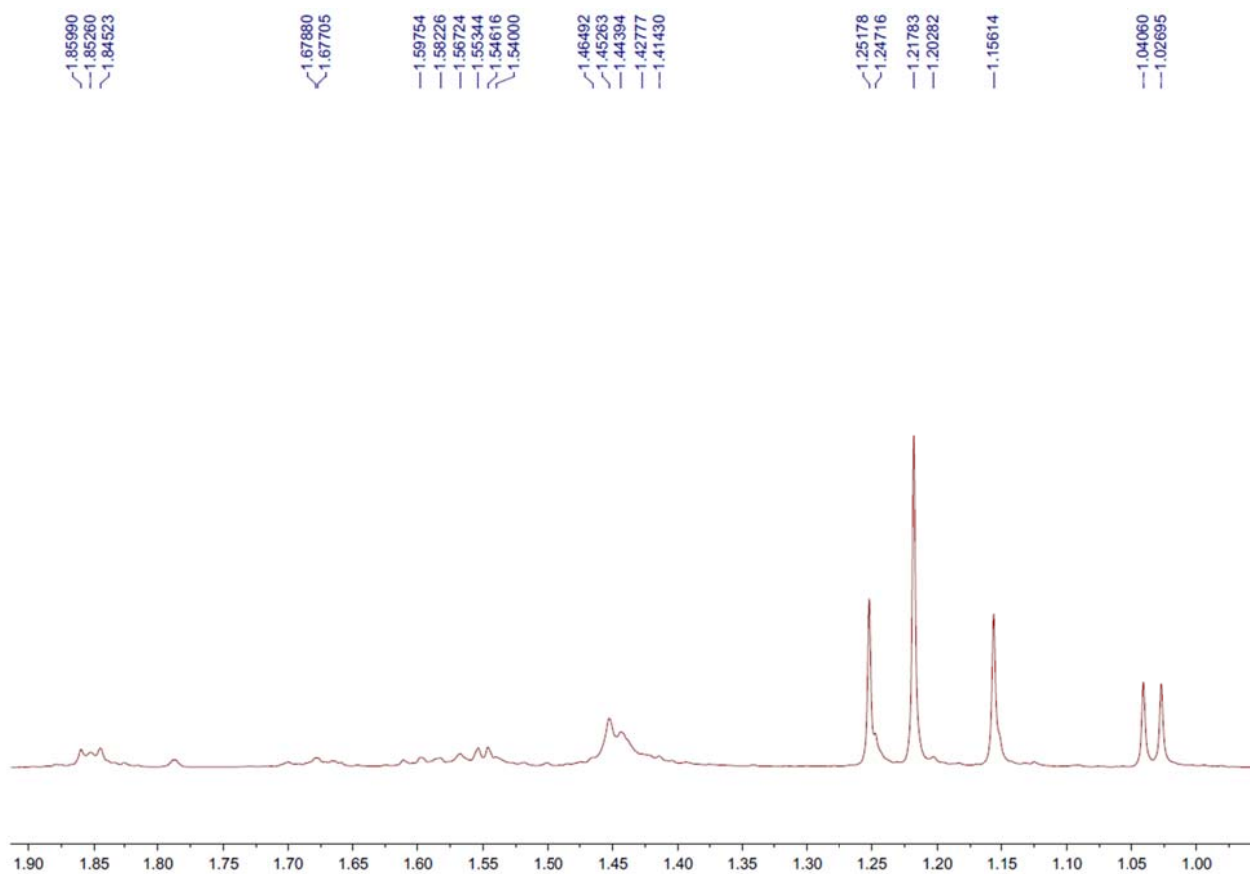

**Figure S15.**  $^1\text{H}$  NMR spectrum of compound **3** in  $\text{CDCl}_3$ .

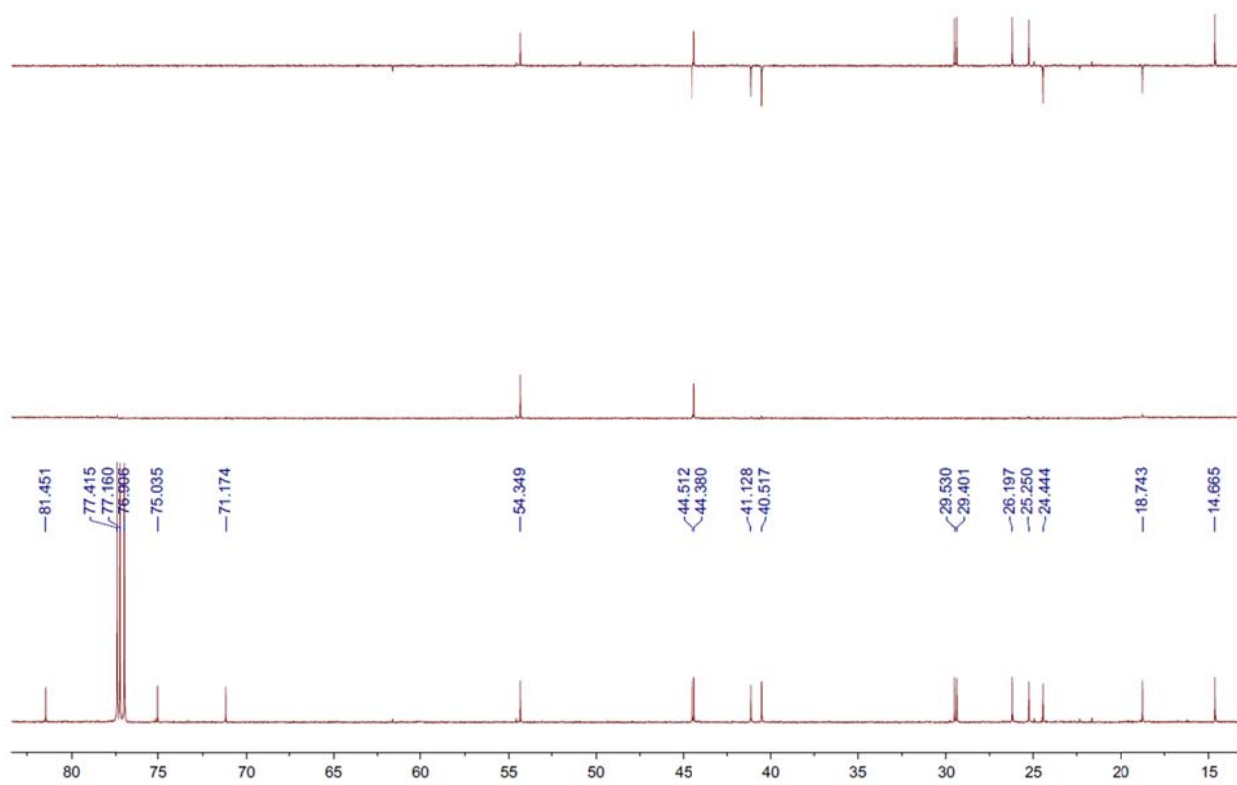

**Figure S16.**  $^{13}\text{C}$  NMR and DEPT spectra of compound **3** in  $\text{CDCl}_3$ .

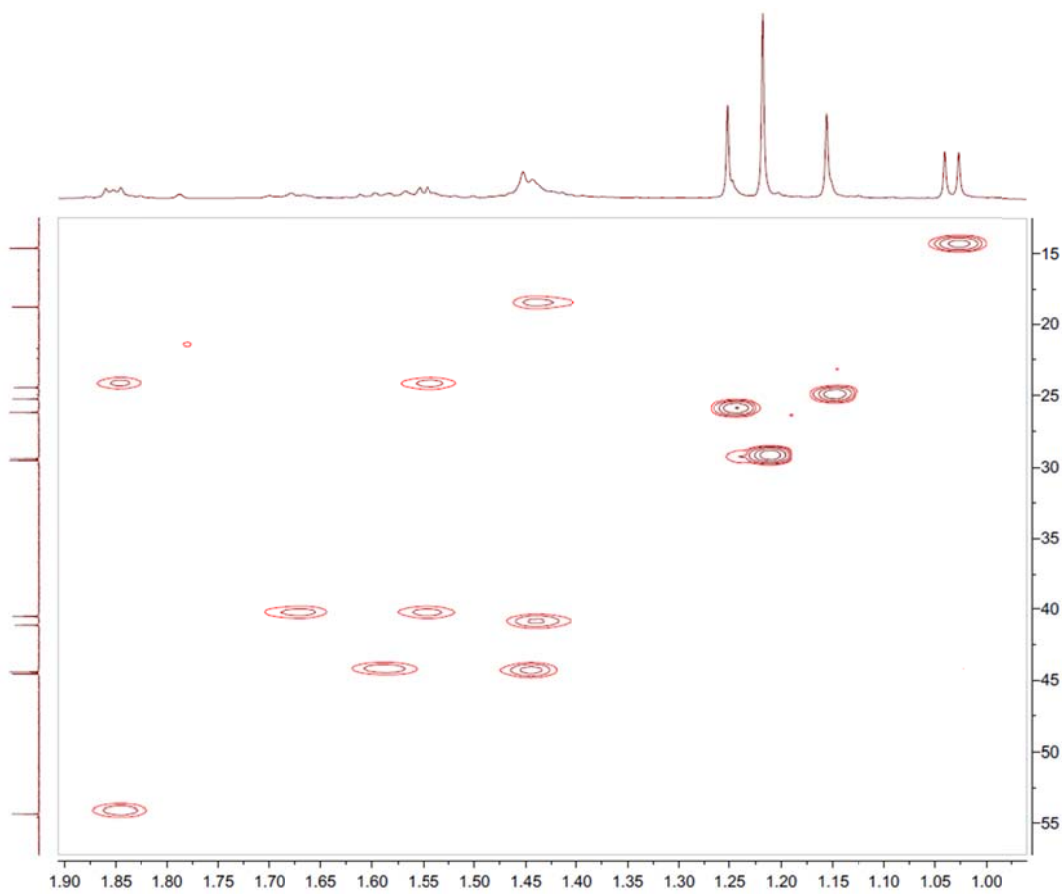

**Figure S17.** HSQC spectrum of compound **3** in  $\text{CDCl}_3$ .

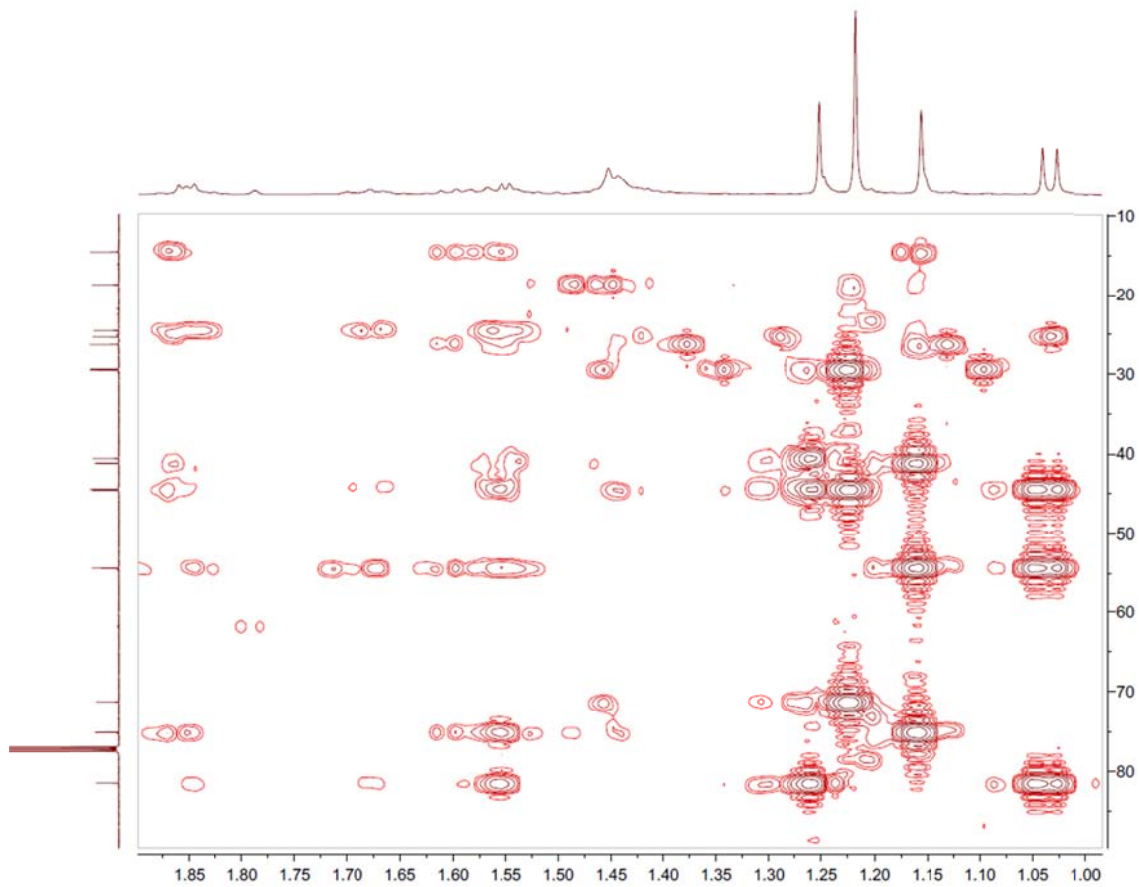

**Figure S18.** HMBC spectrum of compound **3** in  $\text{CDCl}_3$ .

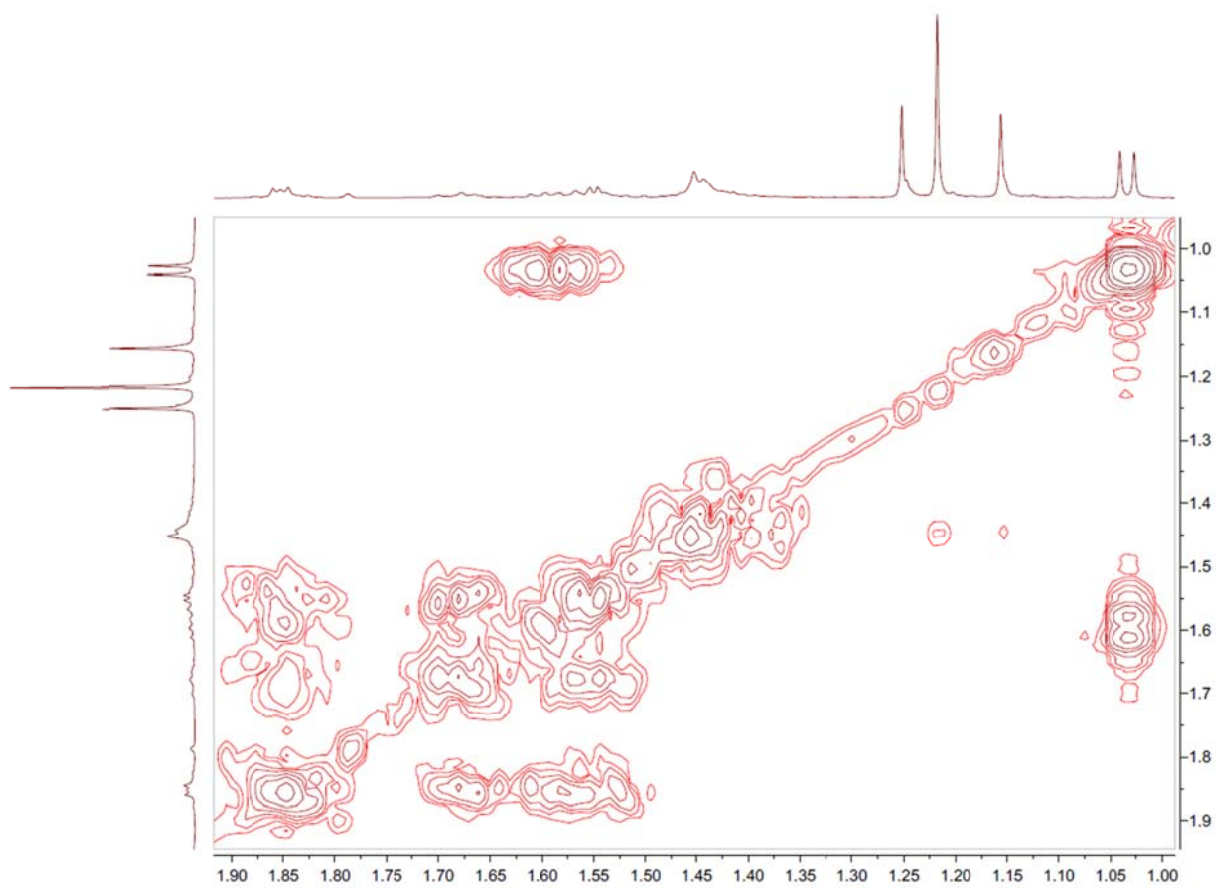

**Figure S19.** COSY spectrum of compound **3** in CDCl<sub>3</sub>.

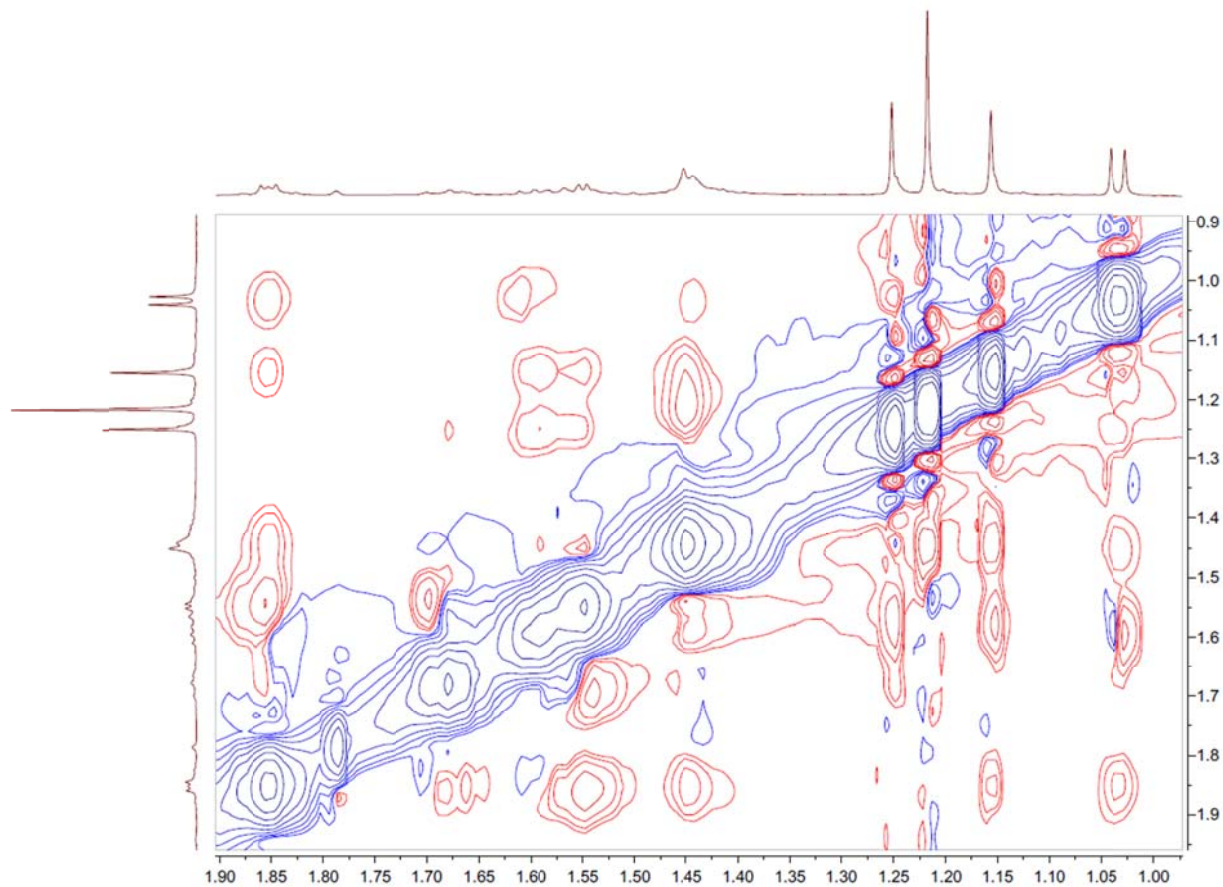

**Figure S20.** NOESY spectrum of compound **3** in CDCl<sub>3</sub>.

### Single Mass Analysis

Tolerance = 10.0 PPM / DBE: min = -10.0, max = 120.0

Selected filters: None

Monoisotopic Mass, Odd and Even Electron Ions

22 formula(e) evaluated with 1 results within limits (up to 51 closest results for each mass)

Elements Used:

C: 0-200 H: 0-400 O: 2-6

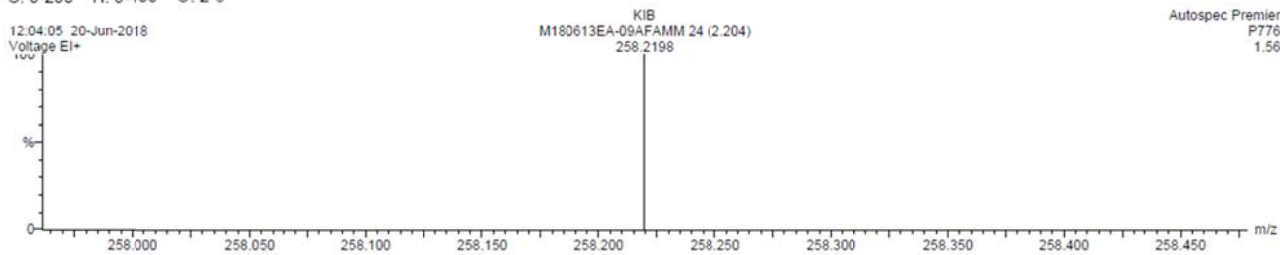

| Mass     | Calc. Mass | mDa | PPM | DBE | i-FIT     | Formula    |
|----------|------------|-----|-----|-----|-----------|------------|
| 258.2198 | 258.2195   | 0.3 | 1.2 | 1.0 | 5546025.5 | C15 H30 O3 |

Figure S21. HREIMS spectrum of compound 3.

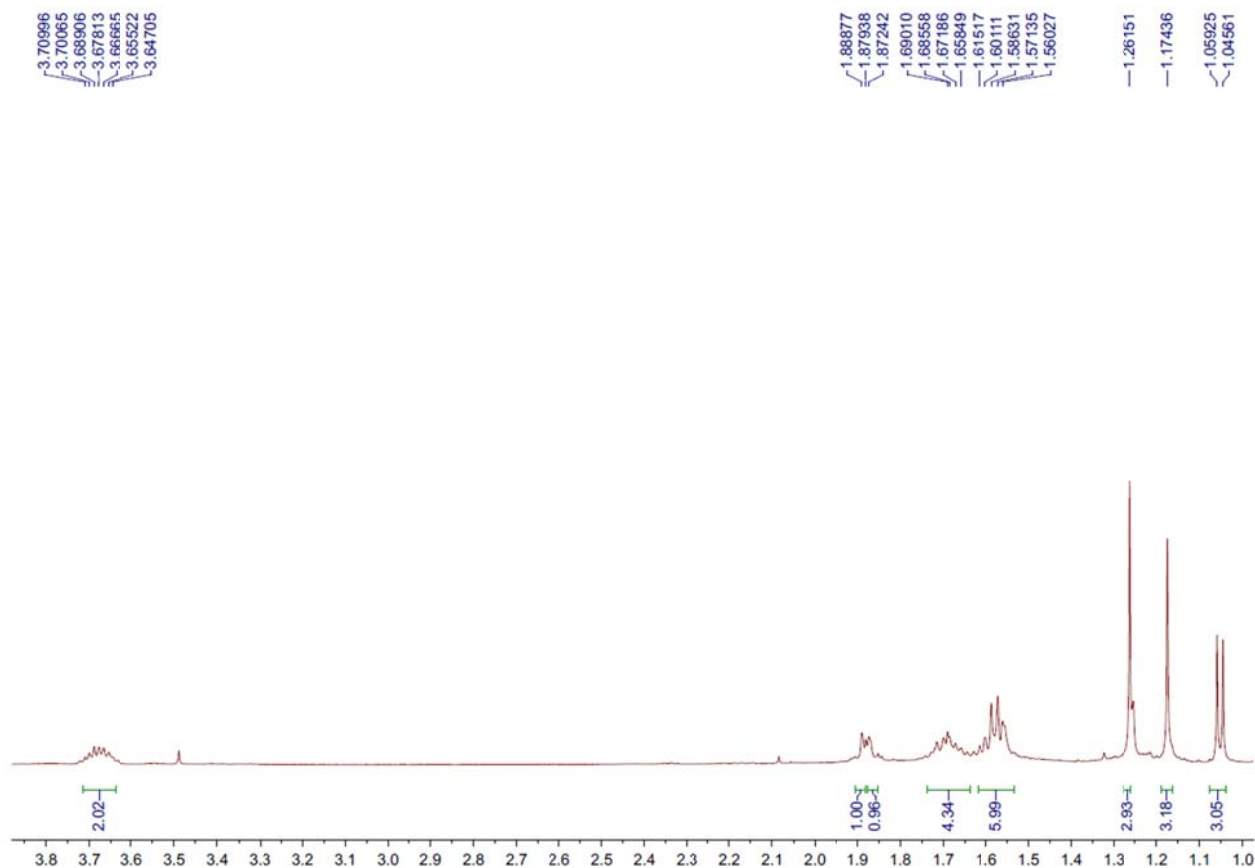

Figure S22. <sup>1</sup>H NMR spectrum of compound 4 in CDCl<sub>3</sub>.

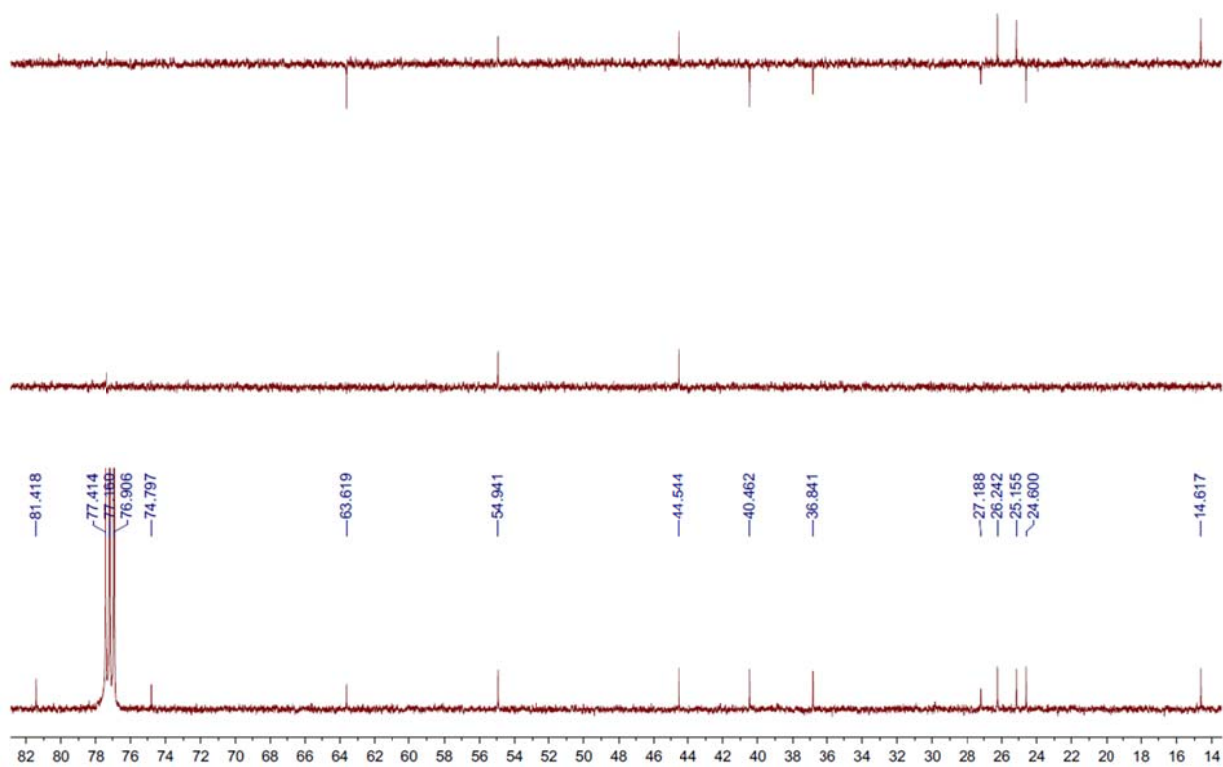

**Figure S23.**  $^{13}\text{C}$  NMR and DEPT spectra of compound **4** in  $\text{CDCl}_3$ .

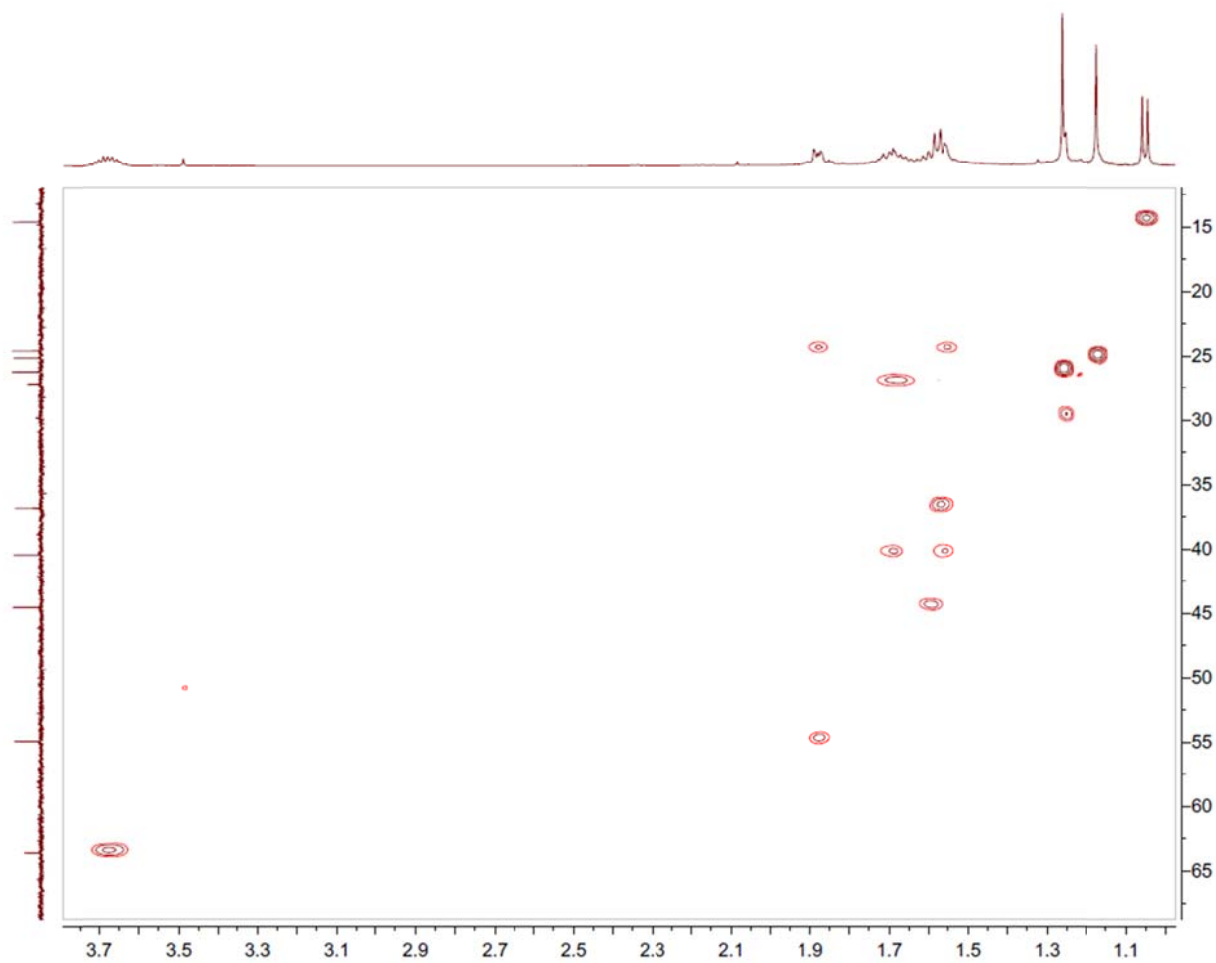

**Figure S24.** HSQC spectrum of compound **4** in  $\text{CDCl}_3$ .



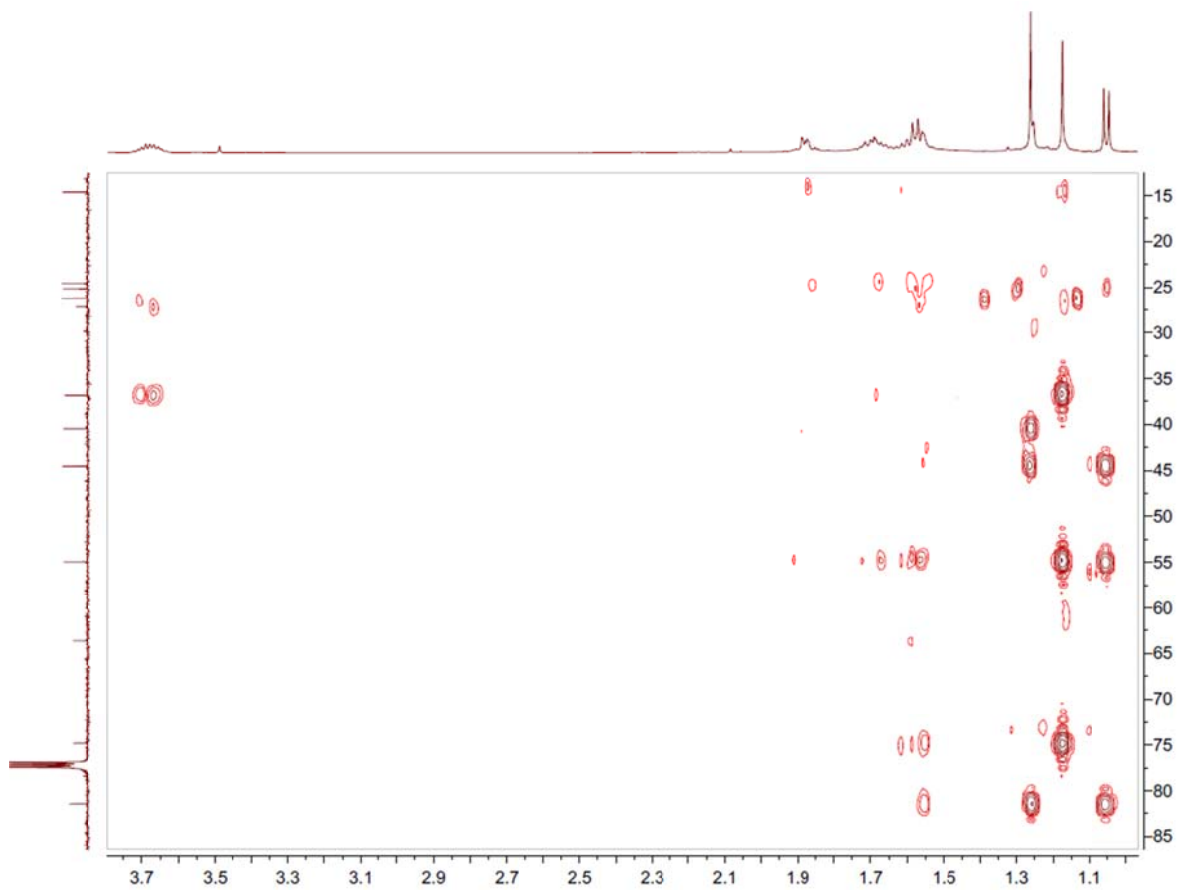

**Figure S25.** HMBC spectrum of compound **4** in CDCl<sub>3</sub>.

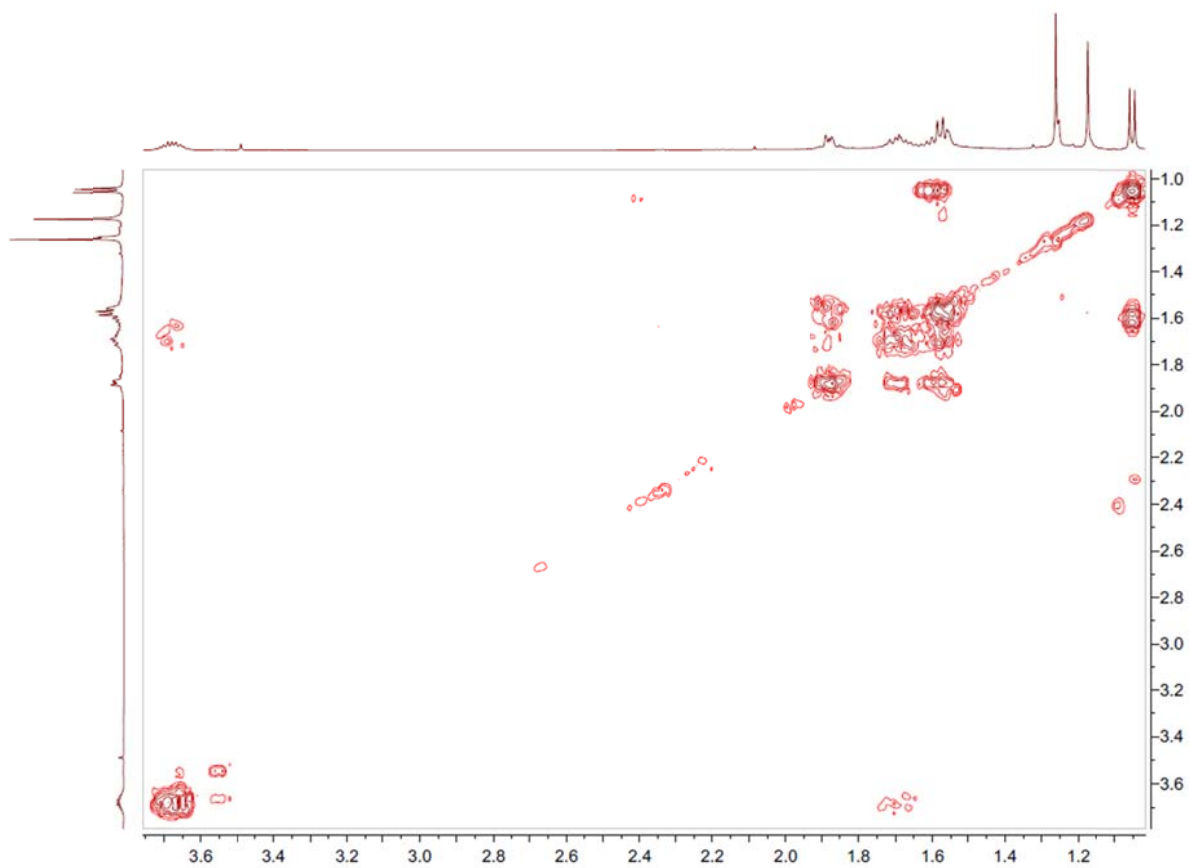

**Figure S26.** COSY spectrum of compound **4** in CDCl<sub>3</sub>.

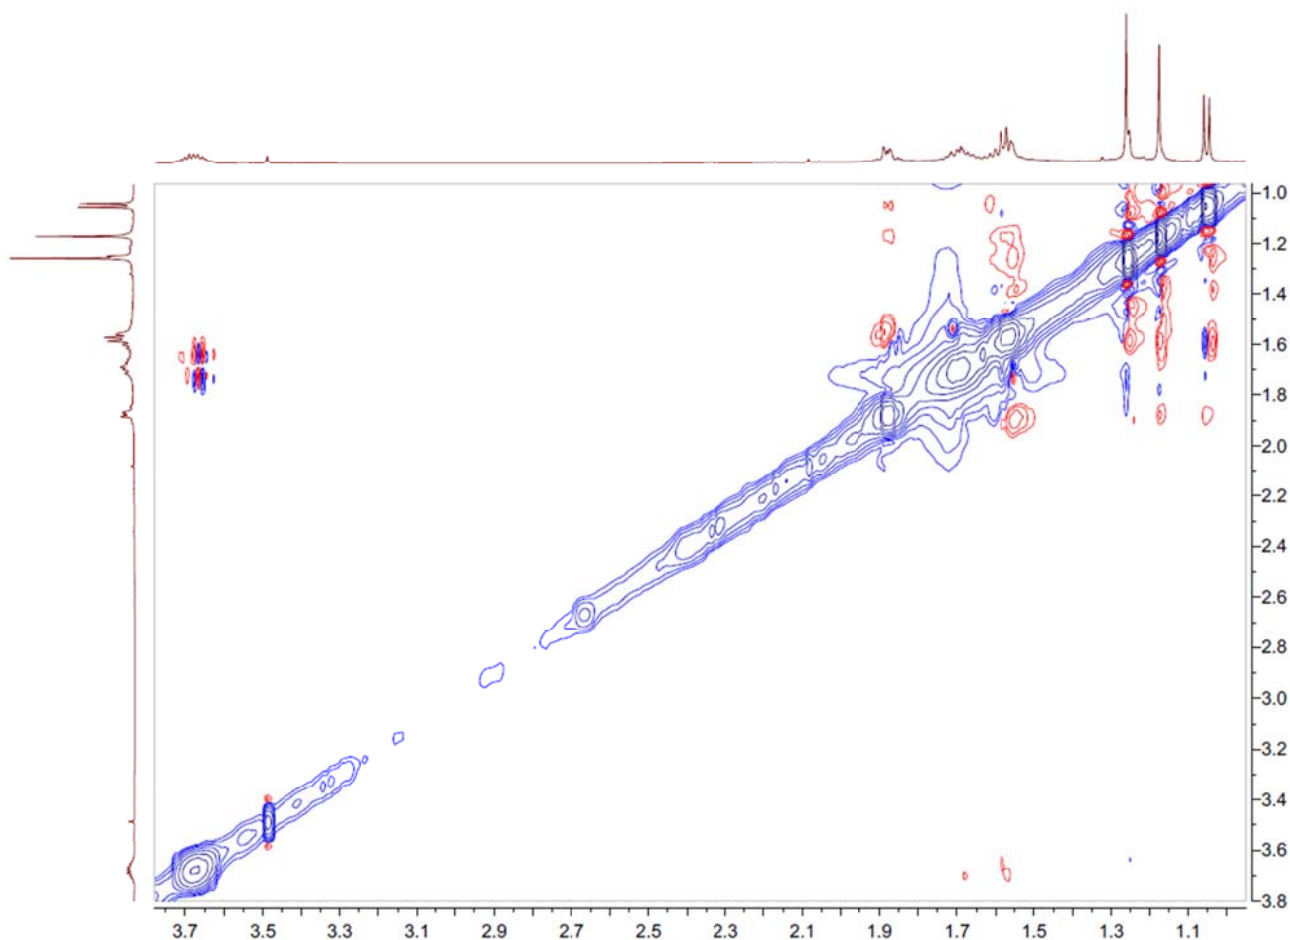

Figure S27. NOESY spectrum of compound 4 in CDCl<sub>3</sub>.

**Single Mass Analysis**

Tolerance = 10.0 PPM / DBE: min = -10.0, max = 120.0  
 Selected filters: None

Monoisotopic Mass, Odd and Even Electron Ions  
 21 formula(e) evaluated with 1 results within limits (up to 51 closest results for each mass)  
 Elements Used:  
 C: 0-200 H: 0-400 O: 2-6

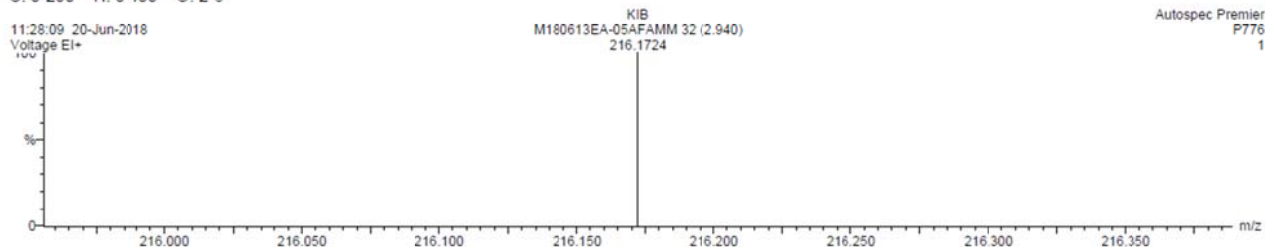

| Mass     | Calc. Mass | mDa  | PPM  | DBE | 1-FIT     | Formula    |
|----------|------------|------|------|-----|-----------|------------|
| 216.1724 | 216.1725   | -0.1 | -0.5 | 1.0 | 5546026.0 | C12 H24 O3 |

Figure S28. HREIMS spectrum of compound 4.

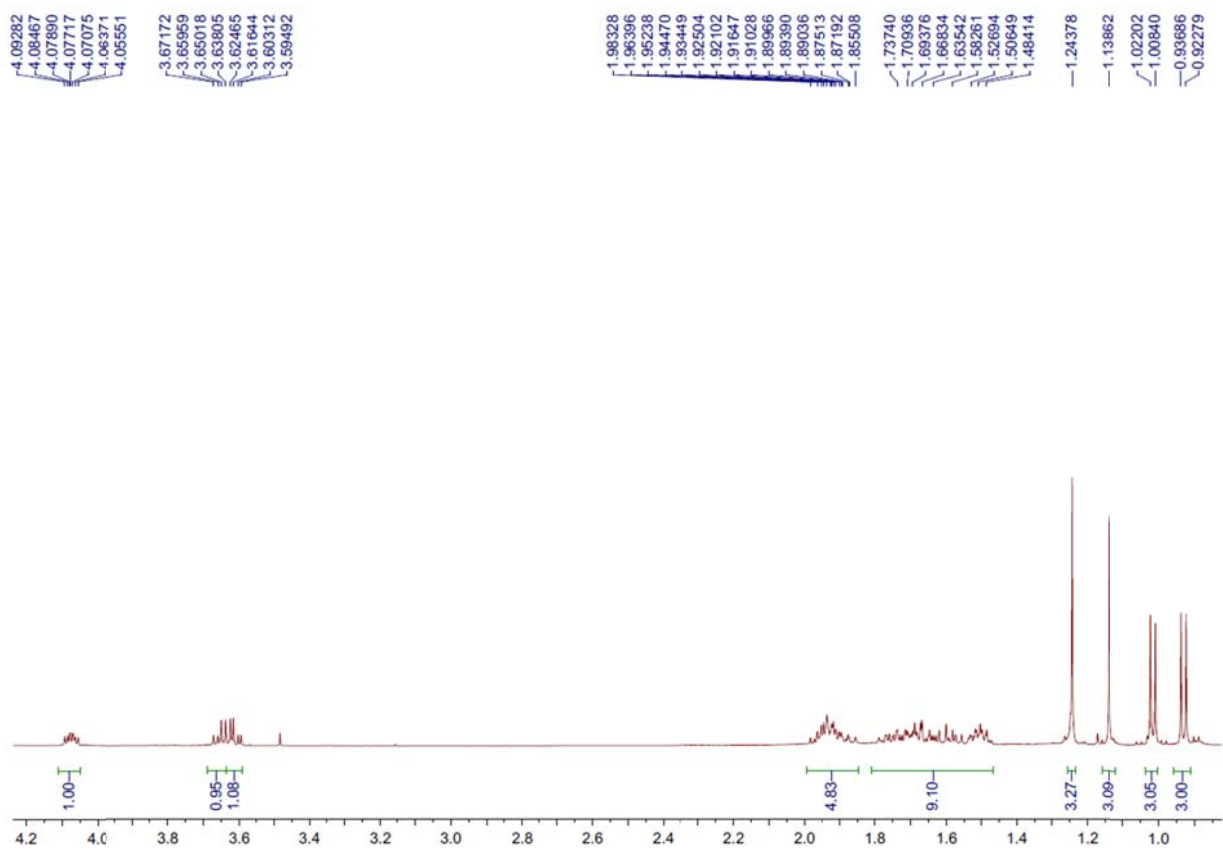

**Figure S29.**  $^1\text{H}$  NMR spectrum of compound **5** in  $\text{CDCl}_3$ .

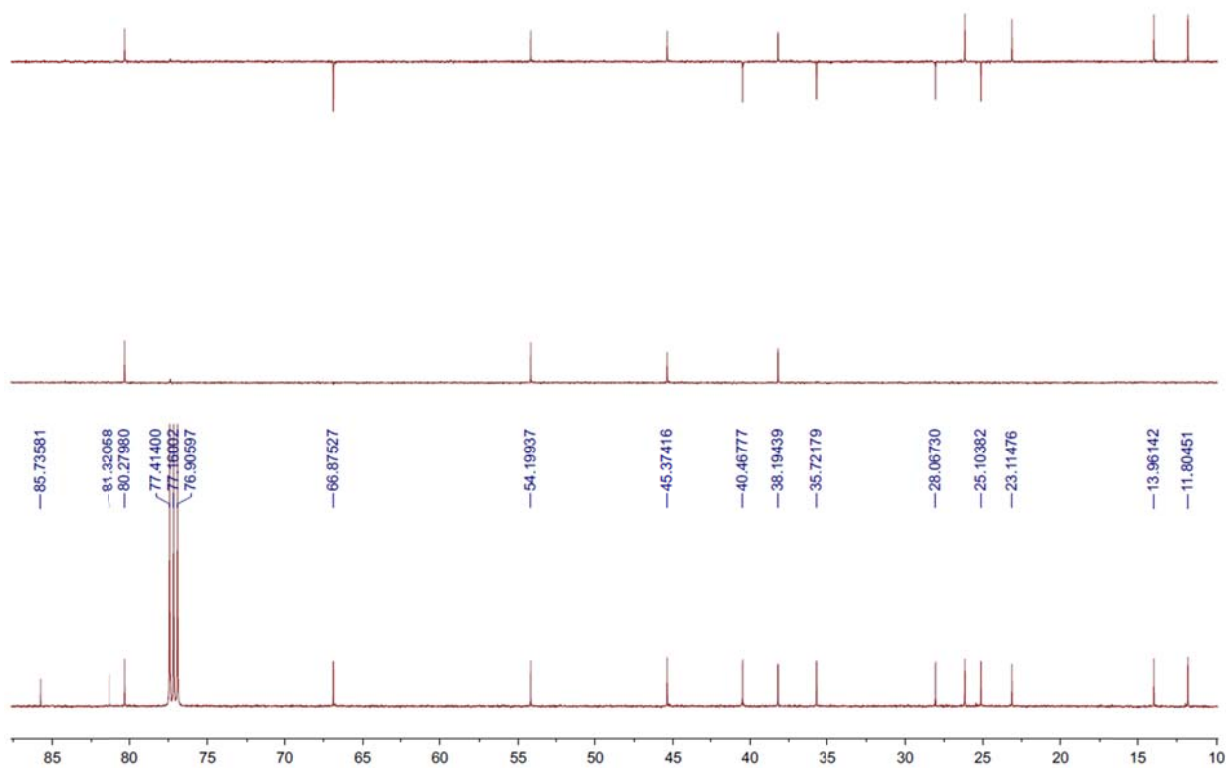

**Figure S30.**  $^{13}\text{C}$  NMR and DEPT spectra of compound **5** in  $\text{CDCl}_3$ .

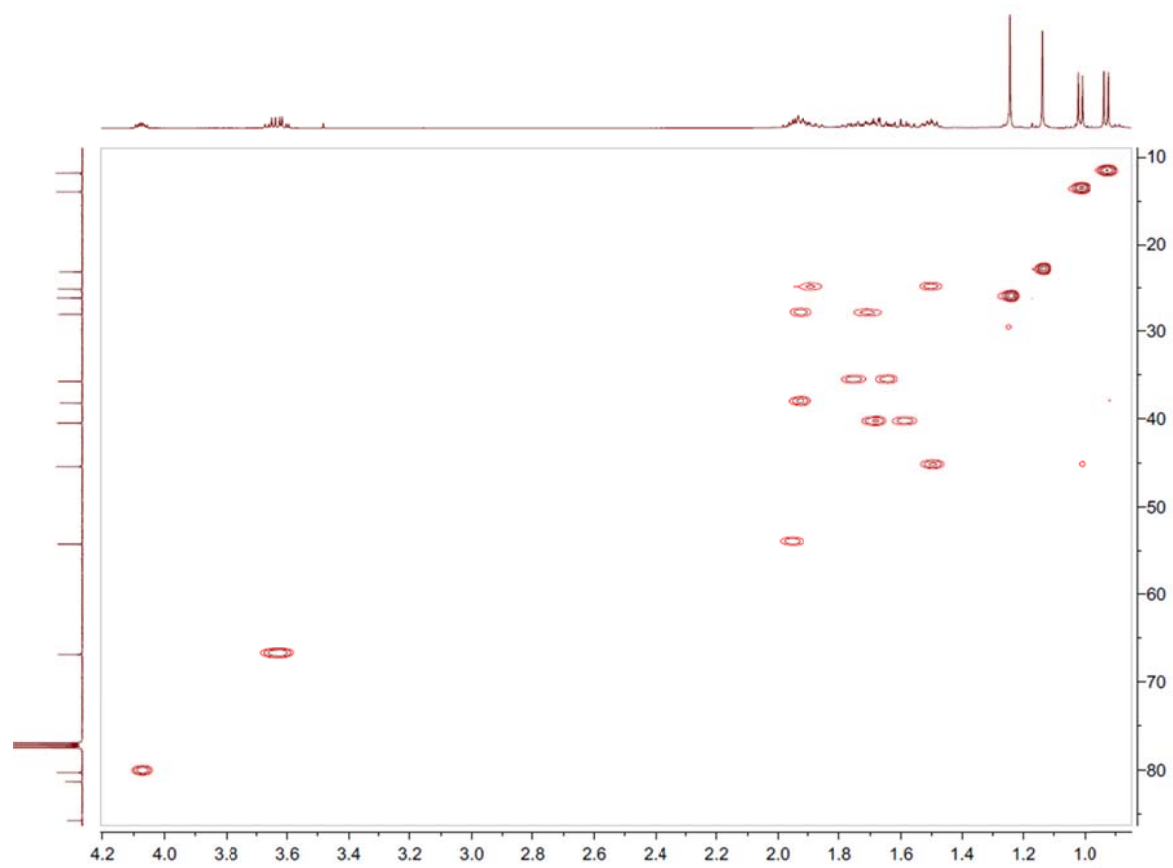

**Figure S31.** HSQC spectrum of compound **5** in  $\text{CDCl}_3$ .

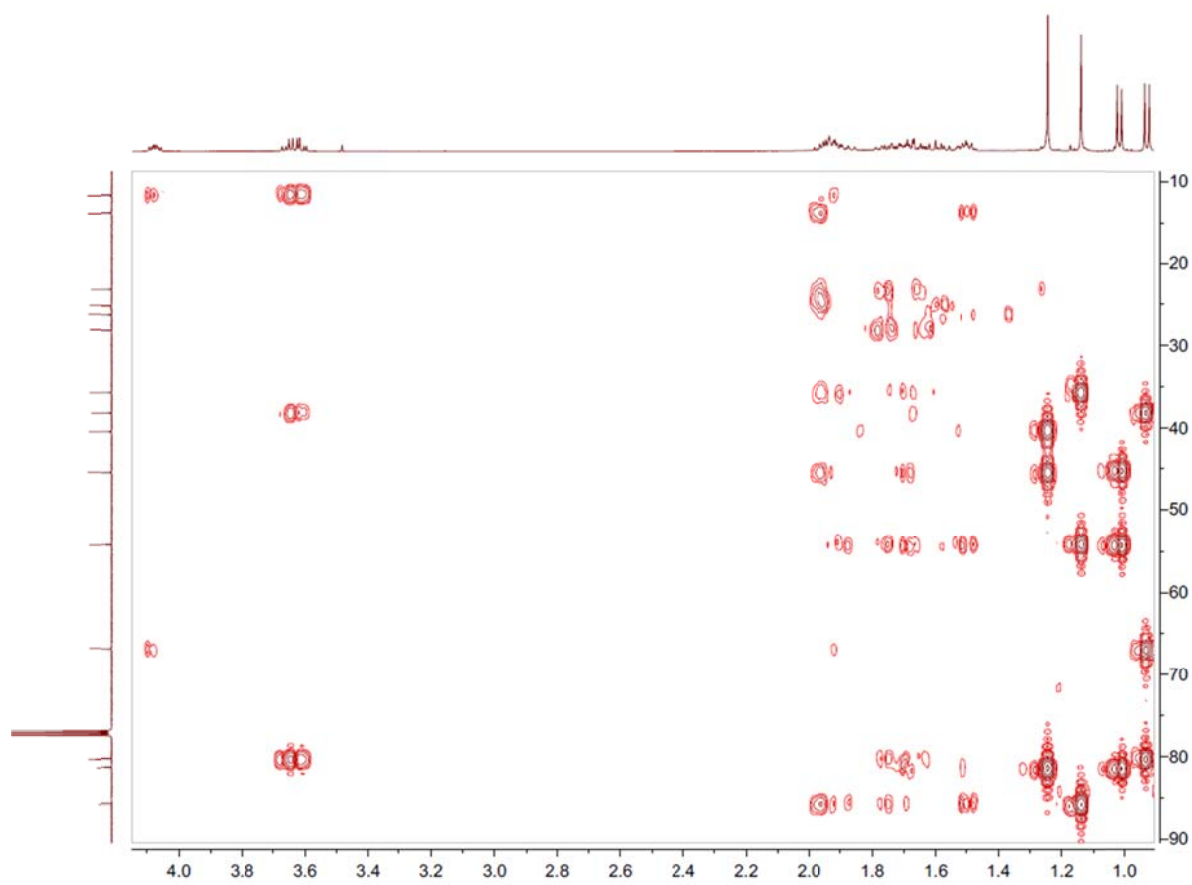

**Figure S32.** HMBC spectrum of compound **5** in  $\text{CDCl}_3$ .

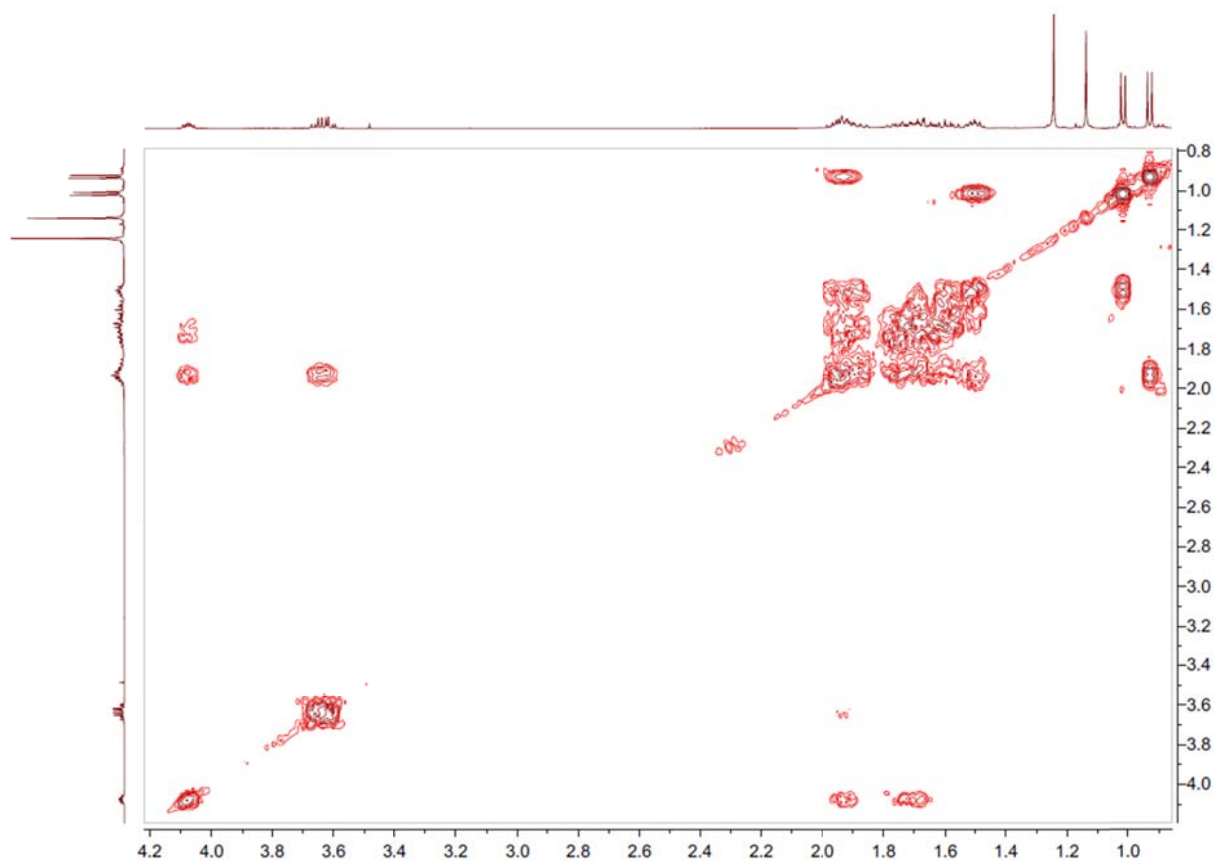

Figure S33. COSY spectrum of compound **5** in CDCl<sub>3</sub>.

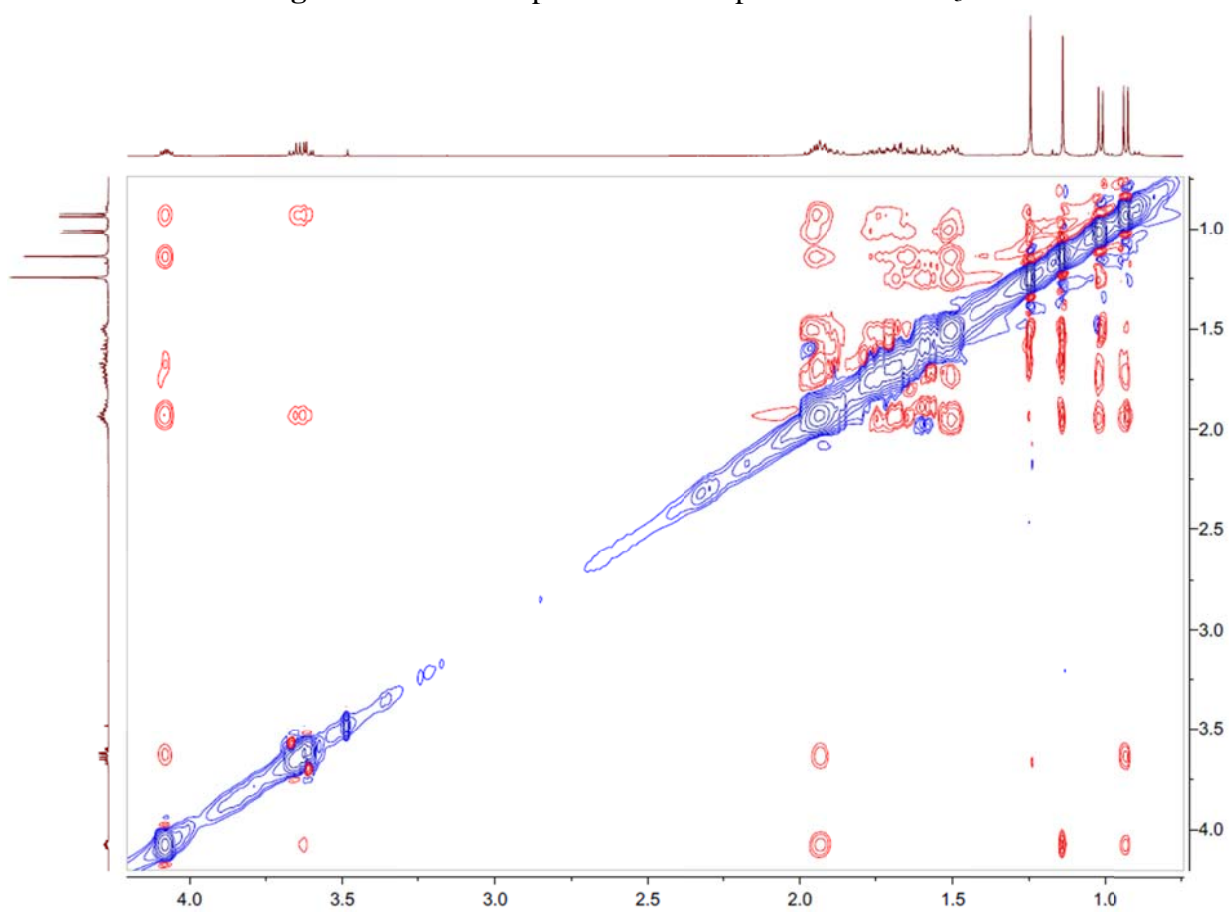

Figure S34. NOESY spectrum of compound **5** in CDCl<sub>3</sub>.

### Single Mass Analysis

Tolerance = 10.0 PPM / DBE: min = -10.0, max = 120.0

Selected filters: None

Monoisotopic Mass, Odd and Even Electron Ions

19 formula(e) evaluated with 1 results within limits (up to 51 closest results for each mass)

Elements Used:

C: 0-200 H: 0-400 O: 2-5

09:22:07 20-Jun-2018

KIB  
M180612EA-07AFAMM 45 (4.133)  
256.2034

Autospec Premier  
P776  
1

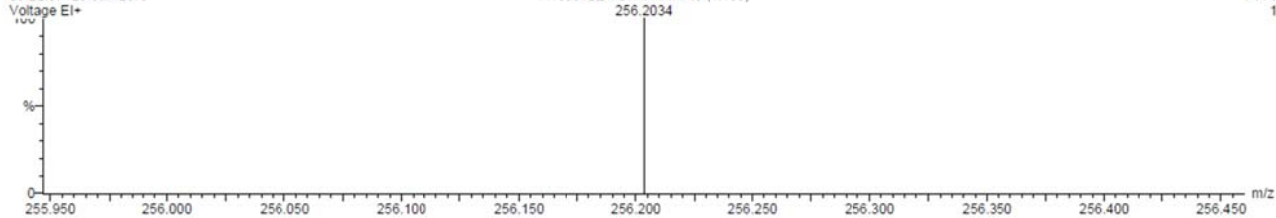

| Mass     | Calc. Mass | mDa  | PPM  | DBE | 1-FIT     | Formula    |
|----------|------------|------|------|-----|-----------|------------|
| 256.2034 | 256.2038   | -0.4 | -1.6 | 2.0 | 5546026.0 | C15 H28 O3 |

Figure S35. HREIMS spectrum of compound 5.

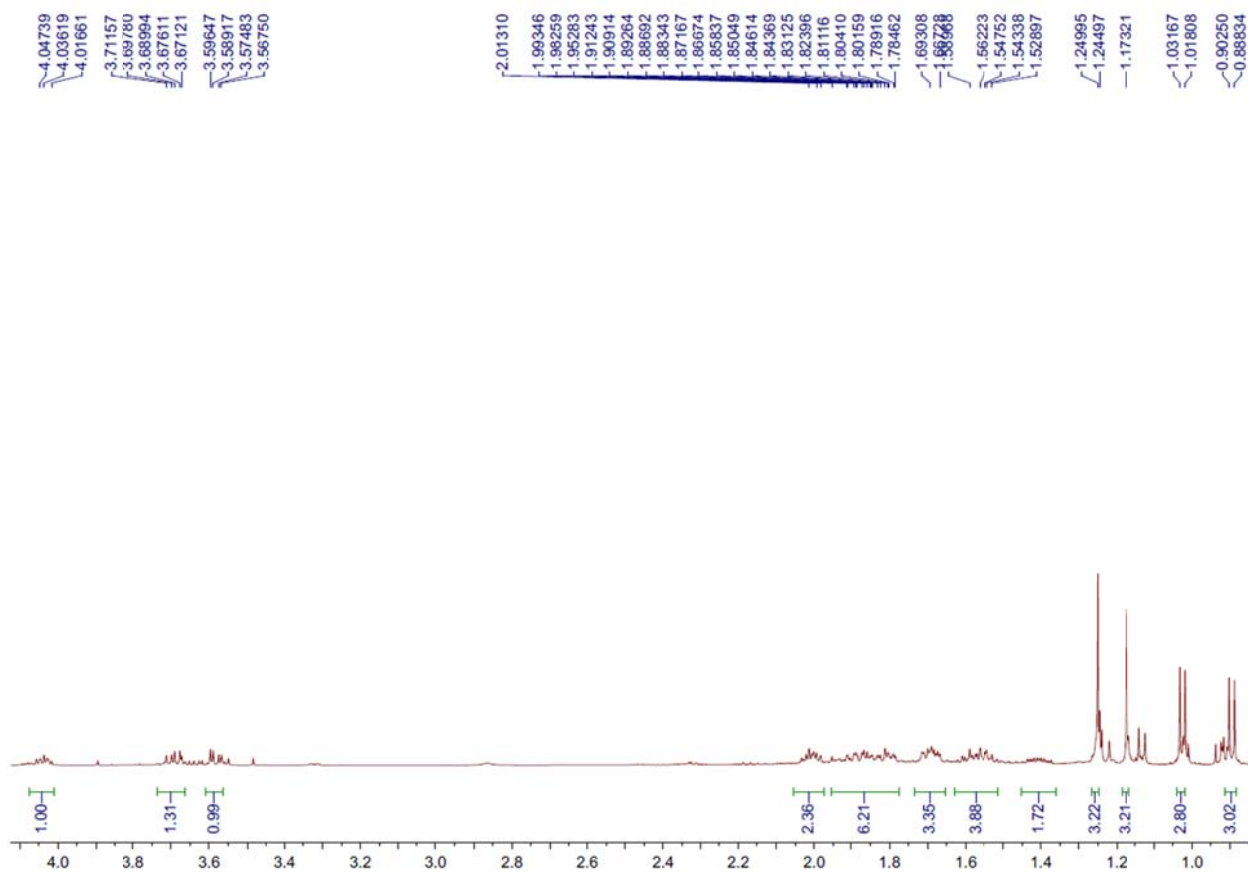

Figure S36. <sup>1</sup>H NMR spectrum of compound 6 in CDCl<sub>3</sub>.

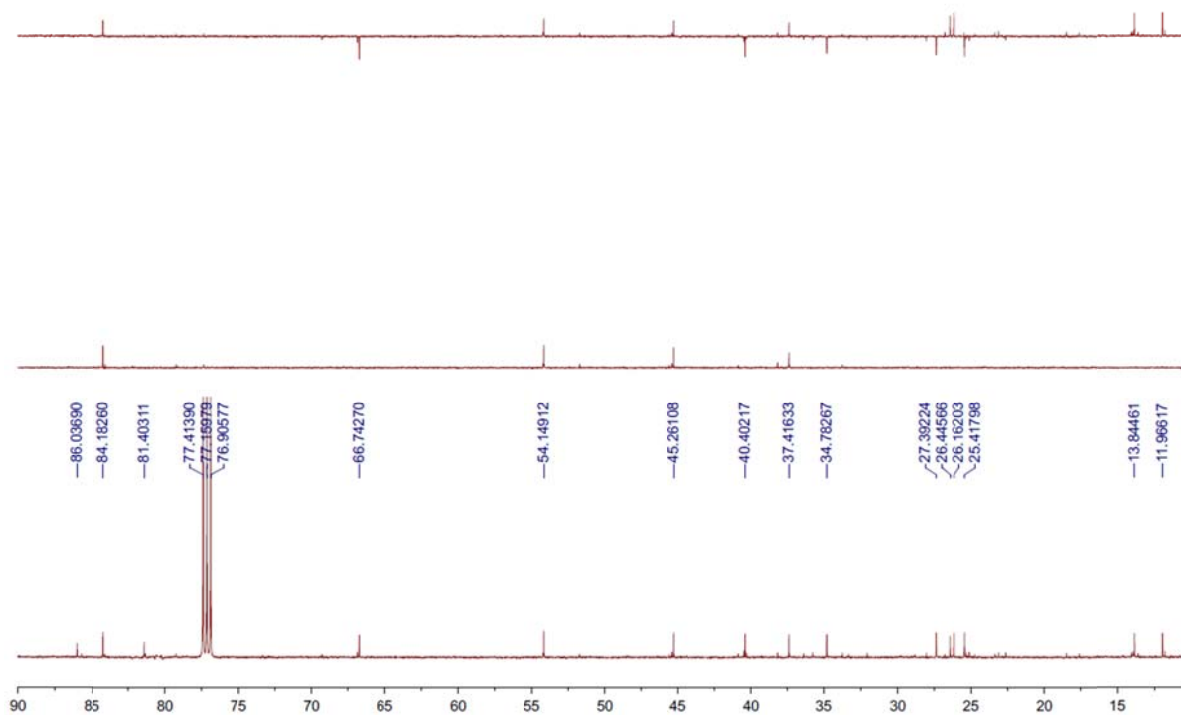

Figure S37.  $^{13}\text{C}$  NMR and DEPT spectra of compound **6** in  $\text{CDCl}_3$ .

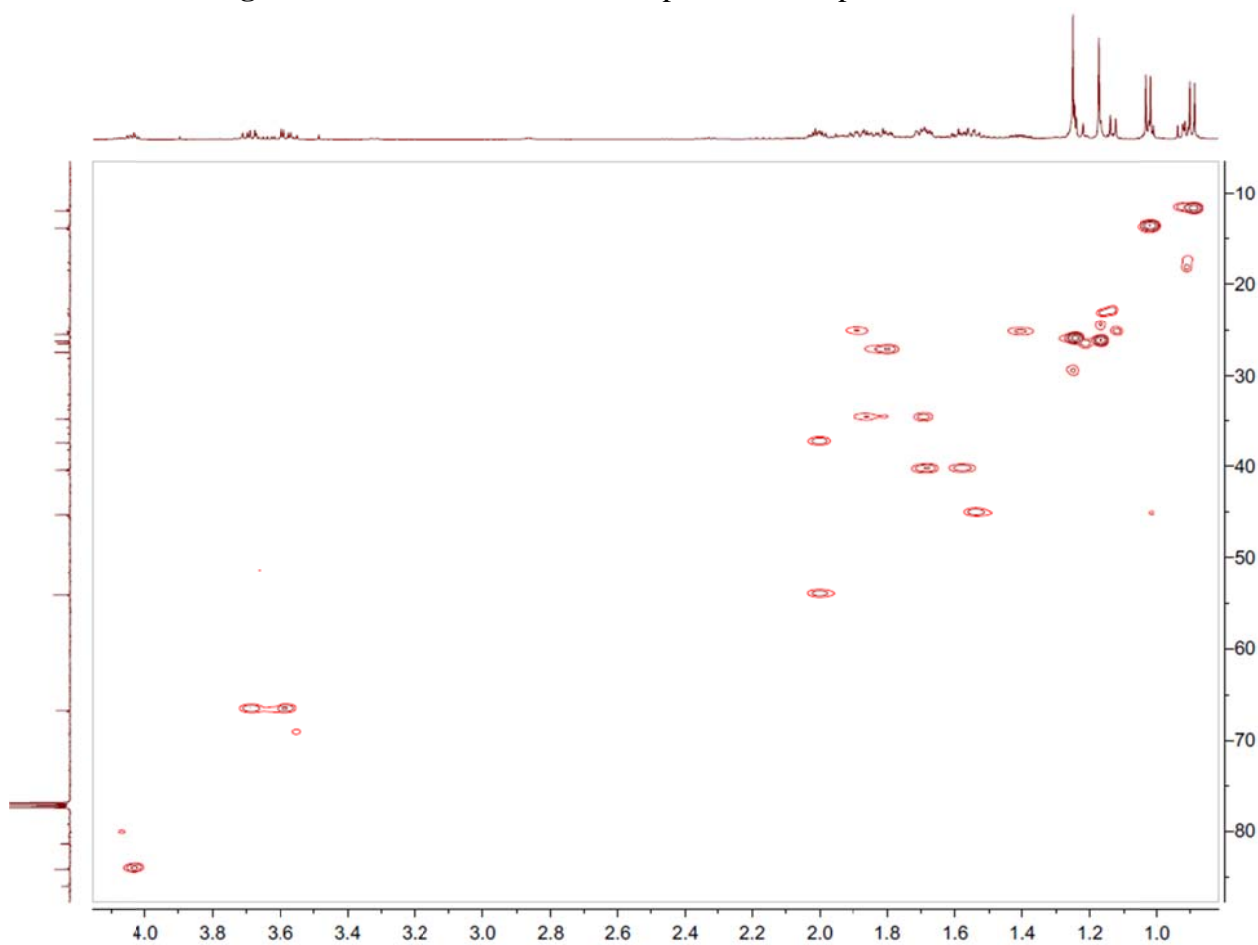

Figure S38. HSQC spectrum of compound **6** in  $\text{CDCl}_3$ .

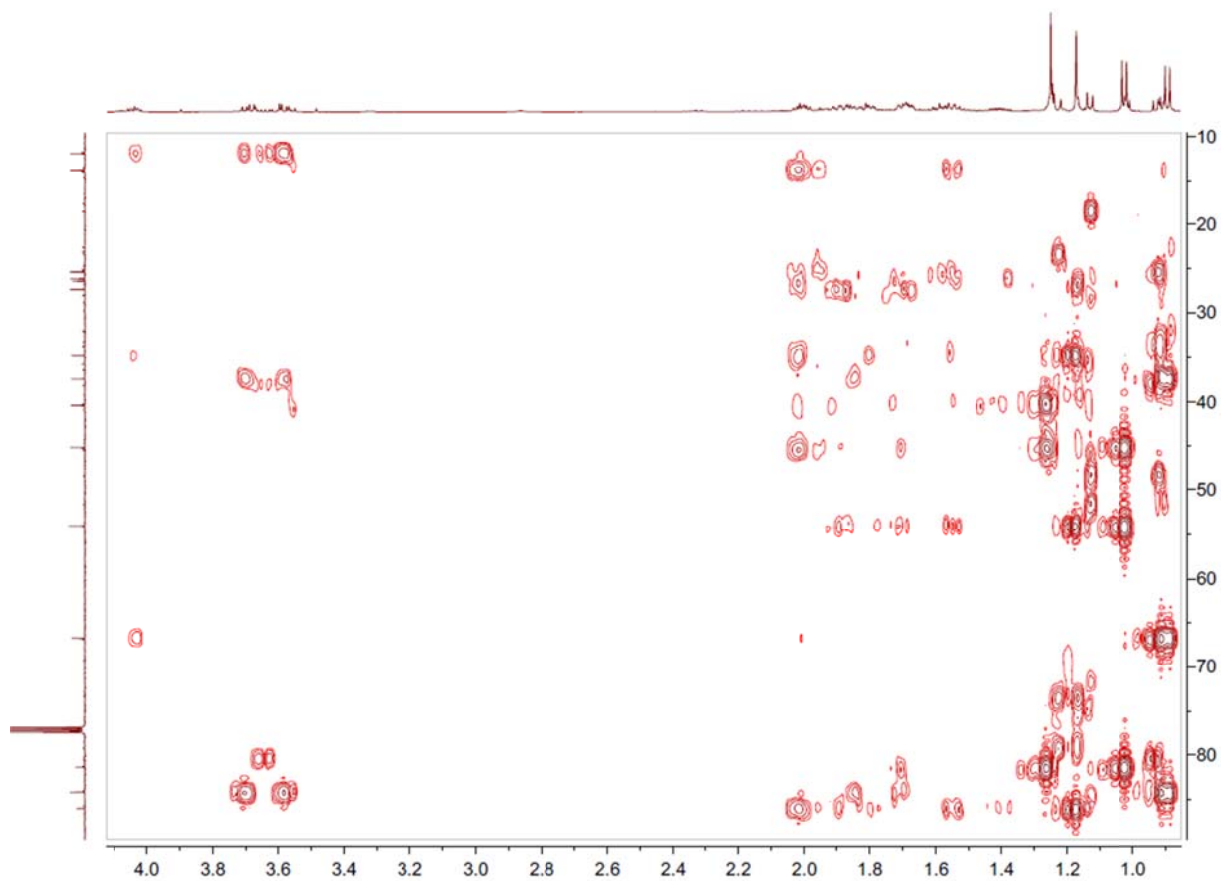

**Figure S39.** HMBC spectrum of compound **6** in  $\text{CDCl}_3$ .

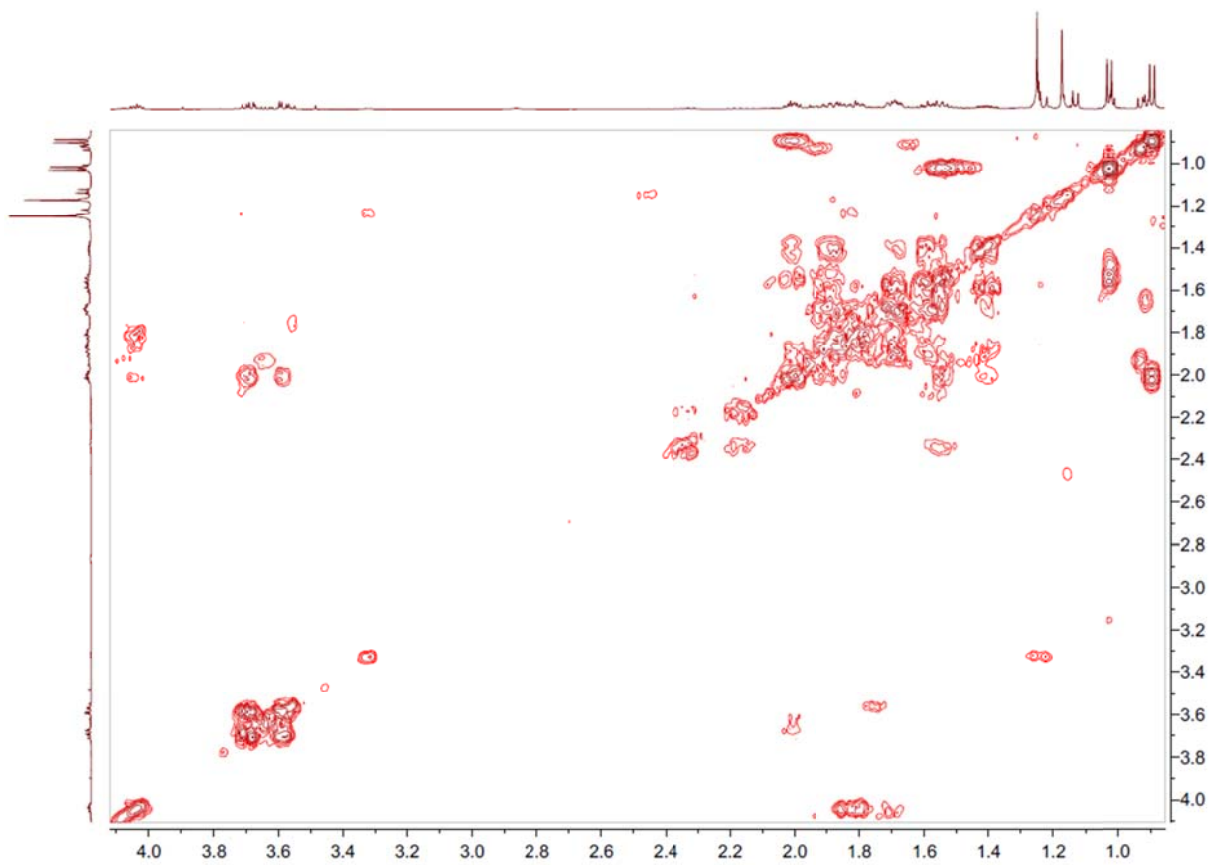

**Figure S40.** COSY spectrum of compound **6** in  $\text{CDCl}_3$ .



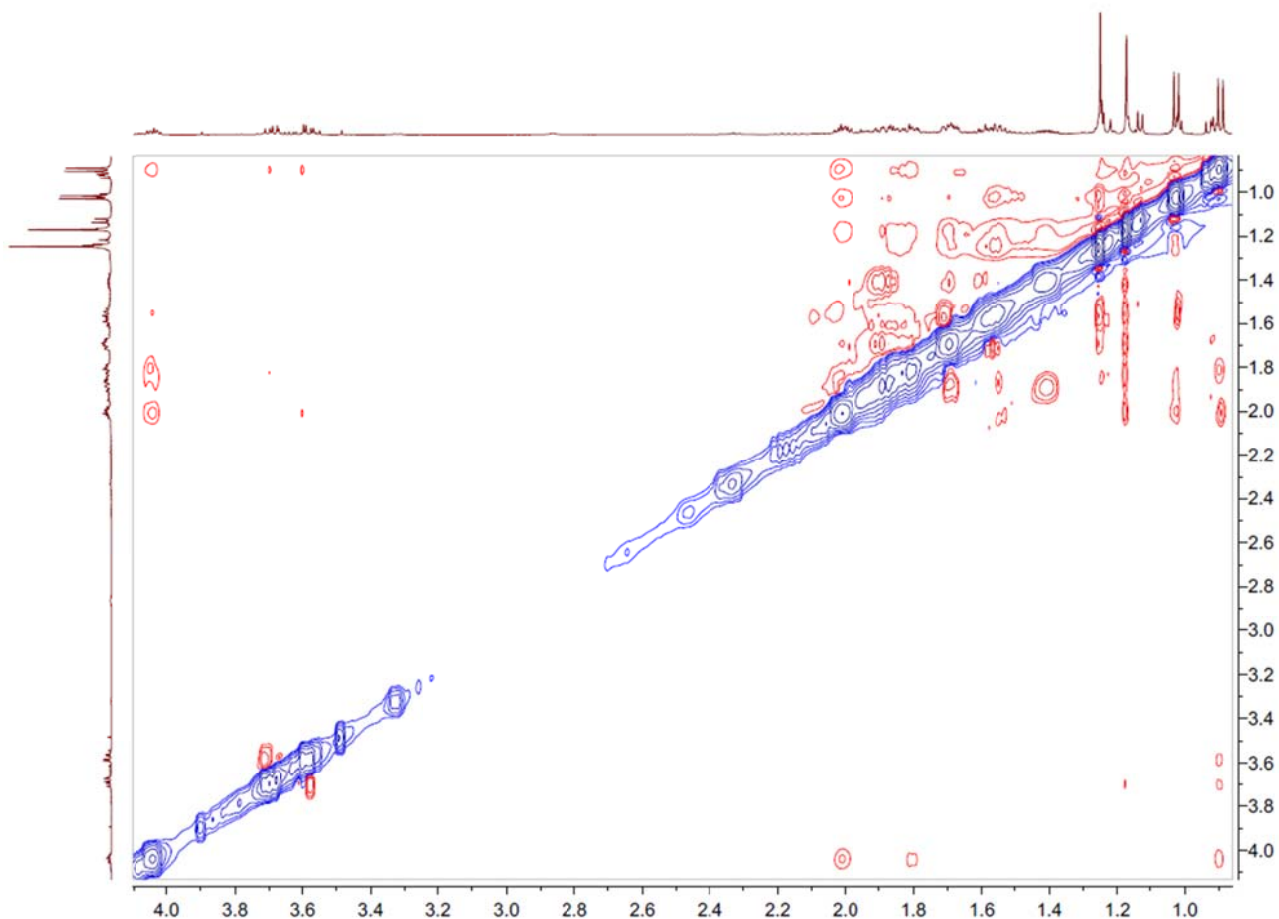

Figure S41. NOESY spectrum of compound **6** in  $\text{CDCl}_3$ .

**Single Mass Analysis**

Tolerance = 10.0 PPM / DBE: min = -10.0, max = 120.0  
 Selected filters: None

Monoisotopic Mass, Odd and Even Electron Ions  
 19 formula(e) evaluated with 1 results within limits (up to 51 closest results for each mass)  
 Elements Used:  
 C: 0-200 H: 0-400 O: 2-5

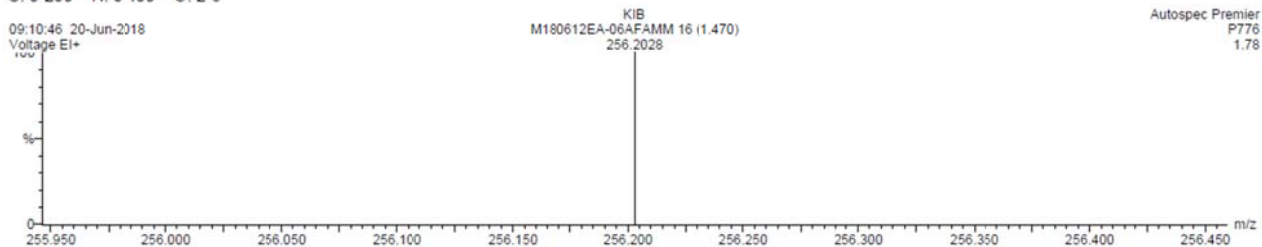

| Mass     | Calc. Mass | mDa  | PPM  | DBE | 1-FIT     | Formula    |
|----------|------------|------|------|-----|-----------|------------|
| 256.2028 | 256.2038   | -1.0 | -3.9 | 2.0 | 5546025.5 | C15 H28 O3 |

Figure S42. HREIMS spectrum of compound **6**.

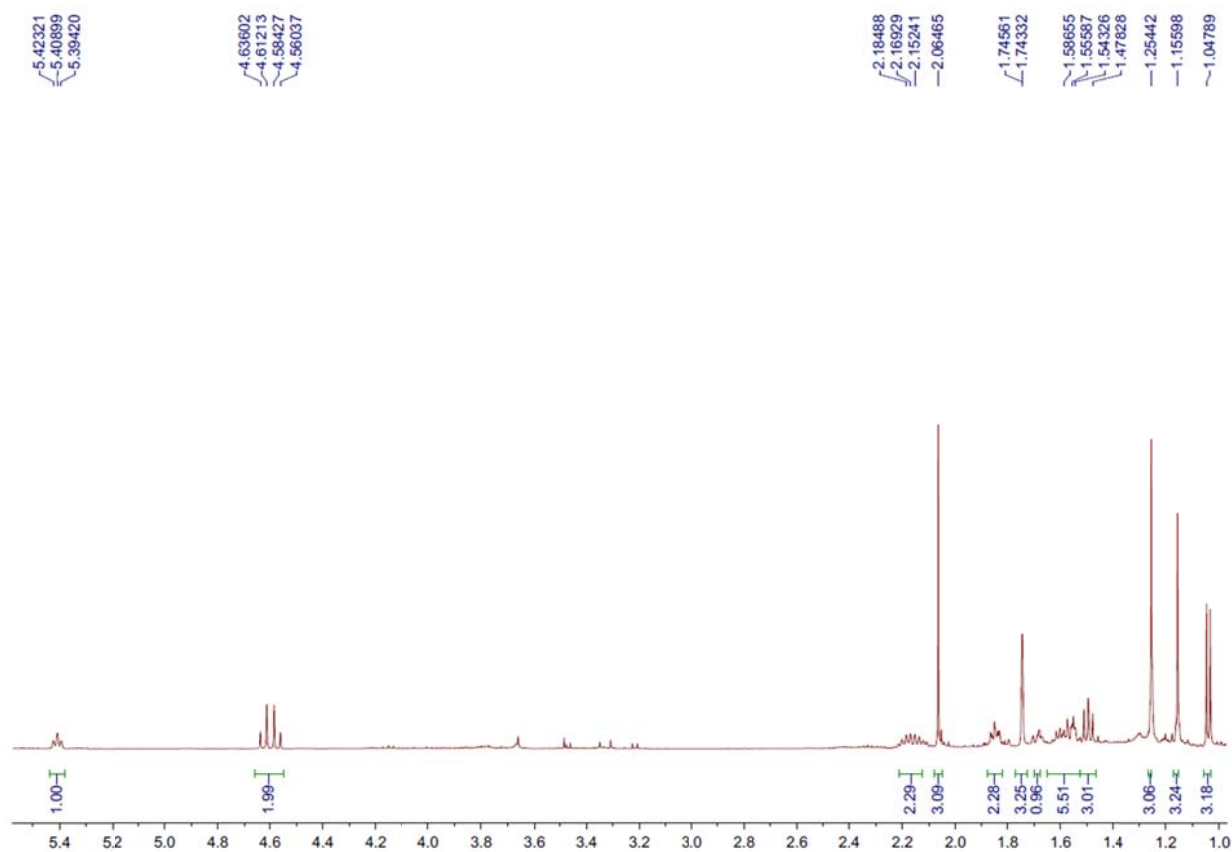

Figure S43.  $^1\text{H}$  NMR spectrum of compound **7** in  $\text{CDCl}_3$ .

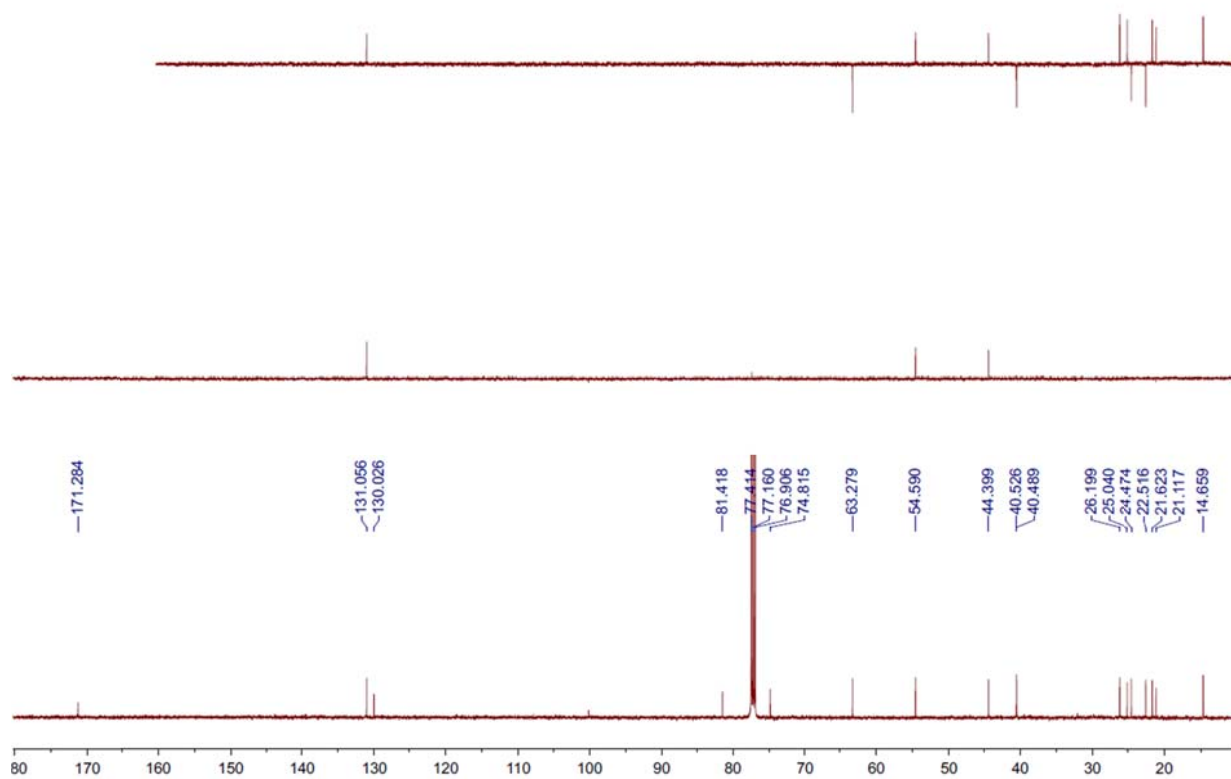

Figure S44.  $^{13}\text{C}$  NMR and DEPT spectra of compound **7** in  $\text{CDCl}_3$ .

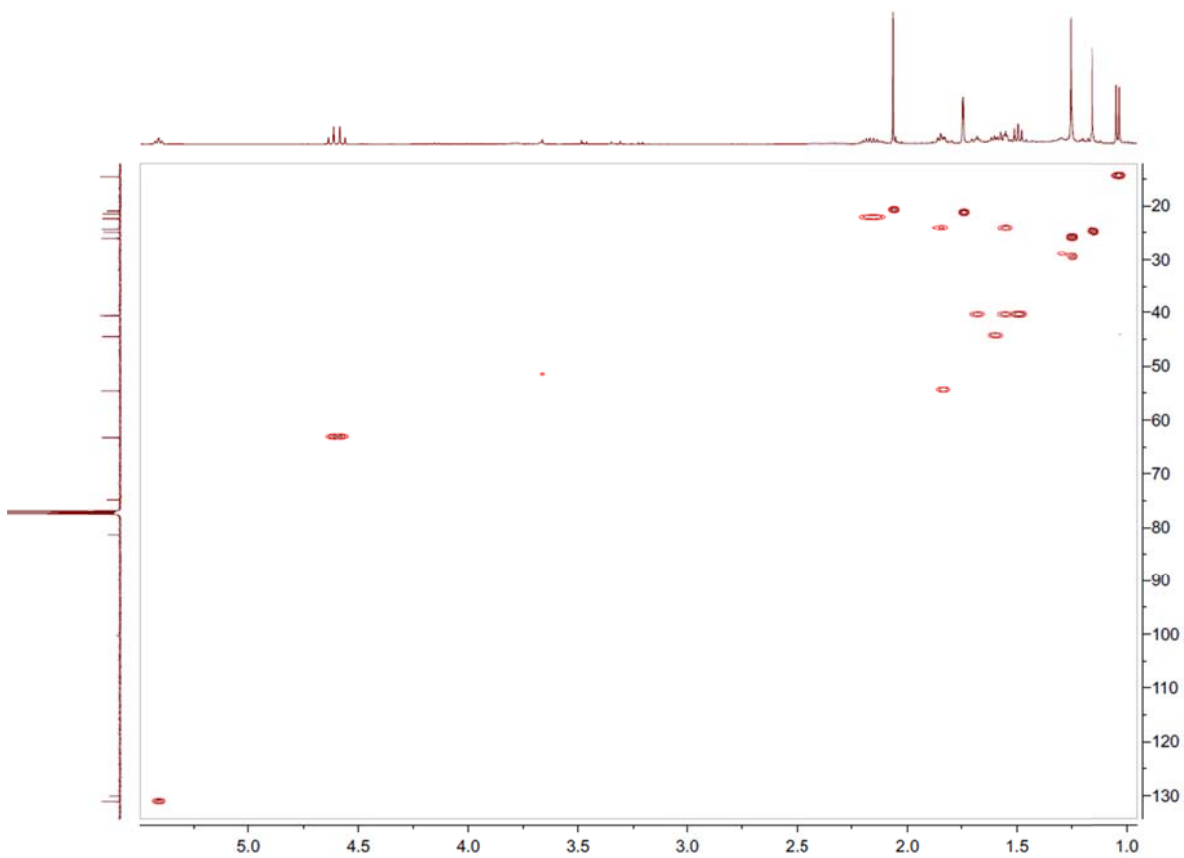

Figure S45. HSQC spectrum of compound 7 in CDCl<sub>3</sub>.

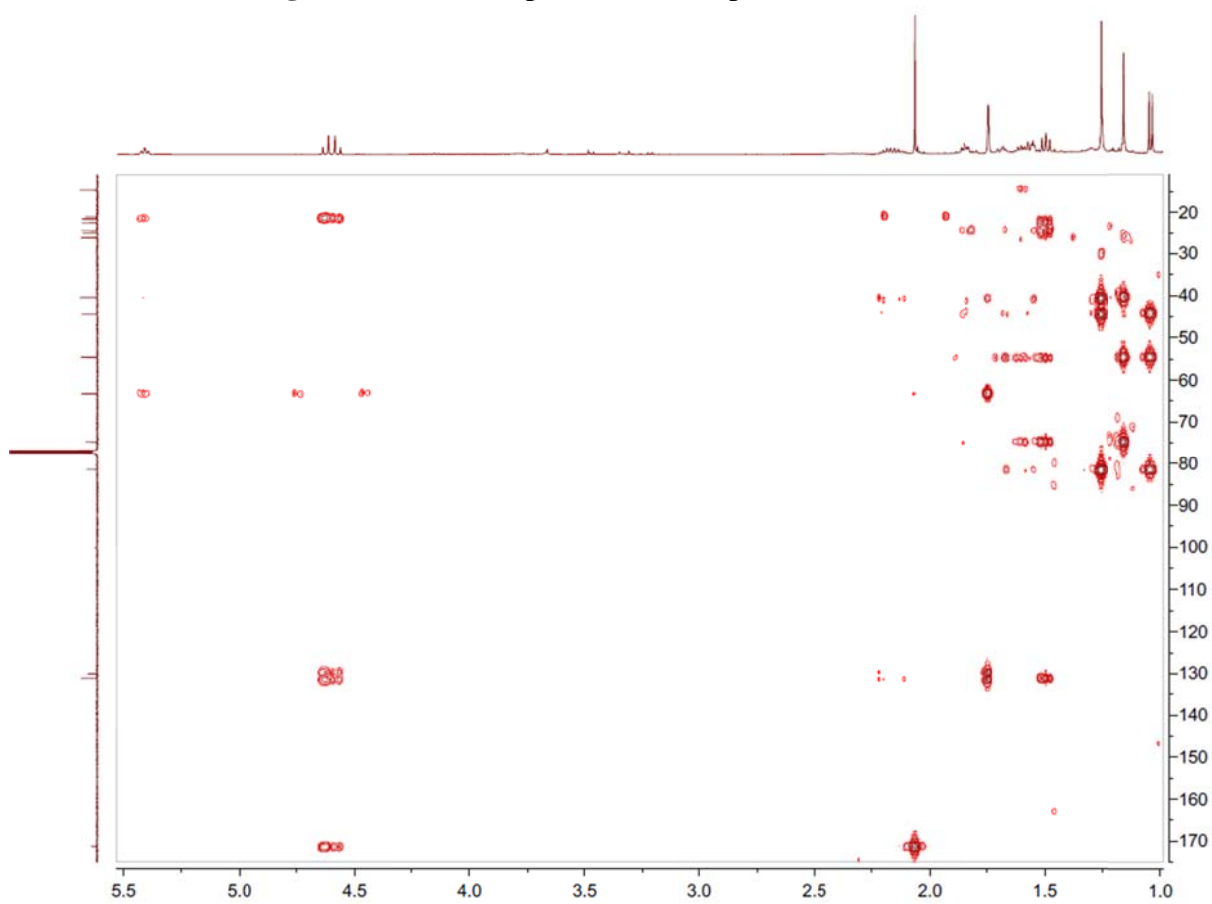

Figure S46. HMBC spectrum of compound 7 in CDCl<sub>3</sub>.

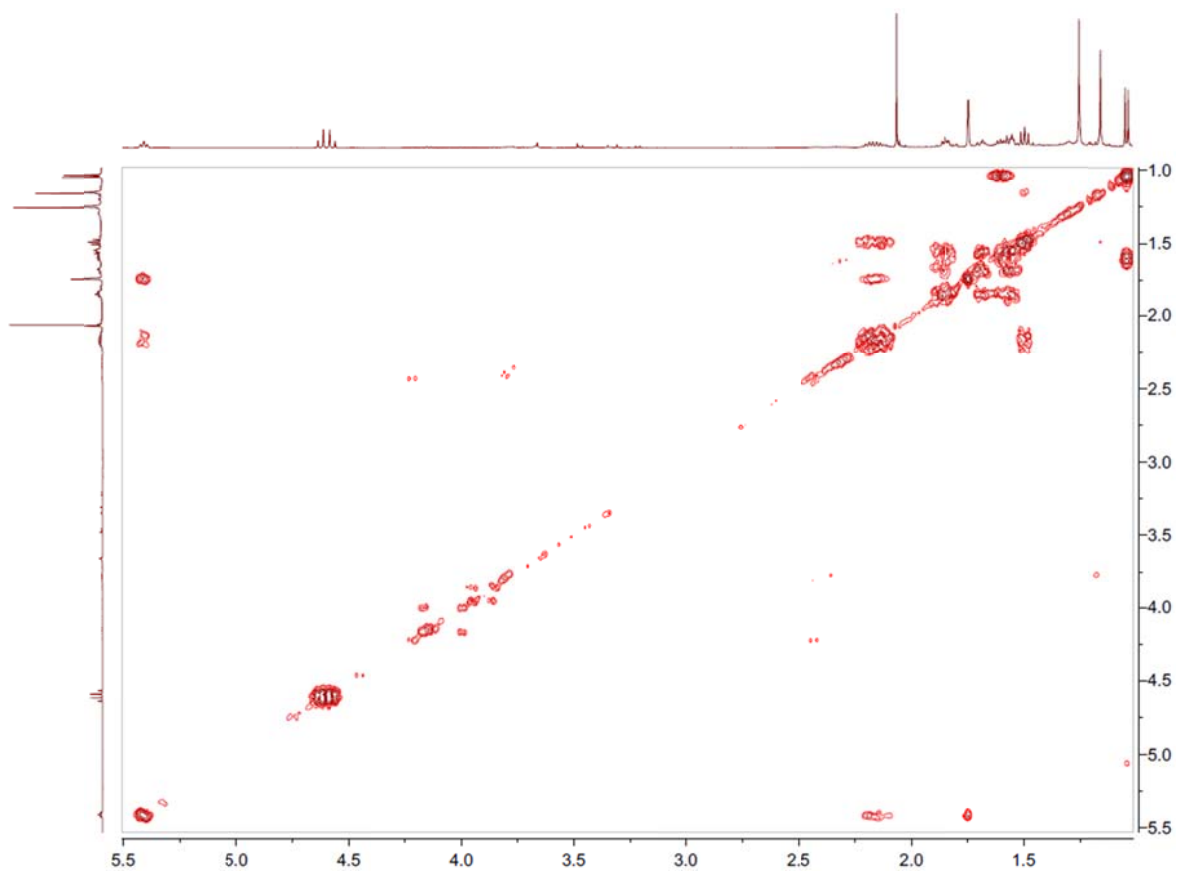

**Figure S47.** COSY spectrum of compound **7** in  $\text{CDCl}_3$ .

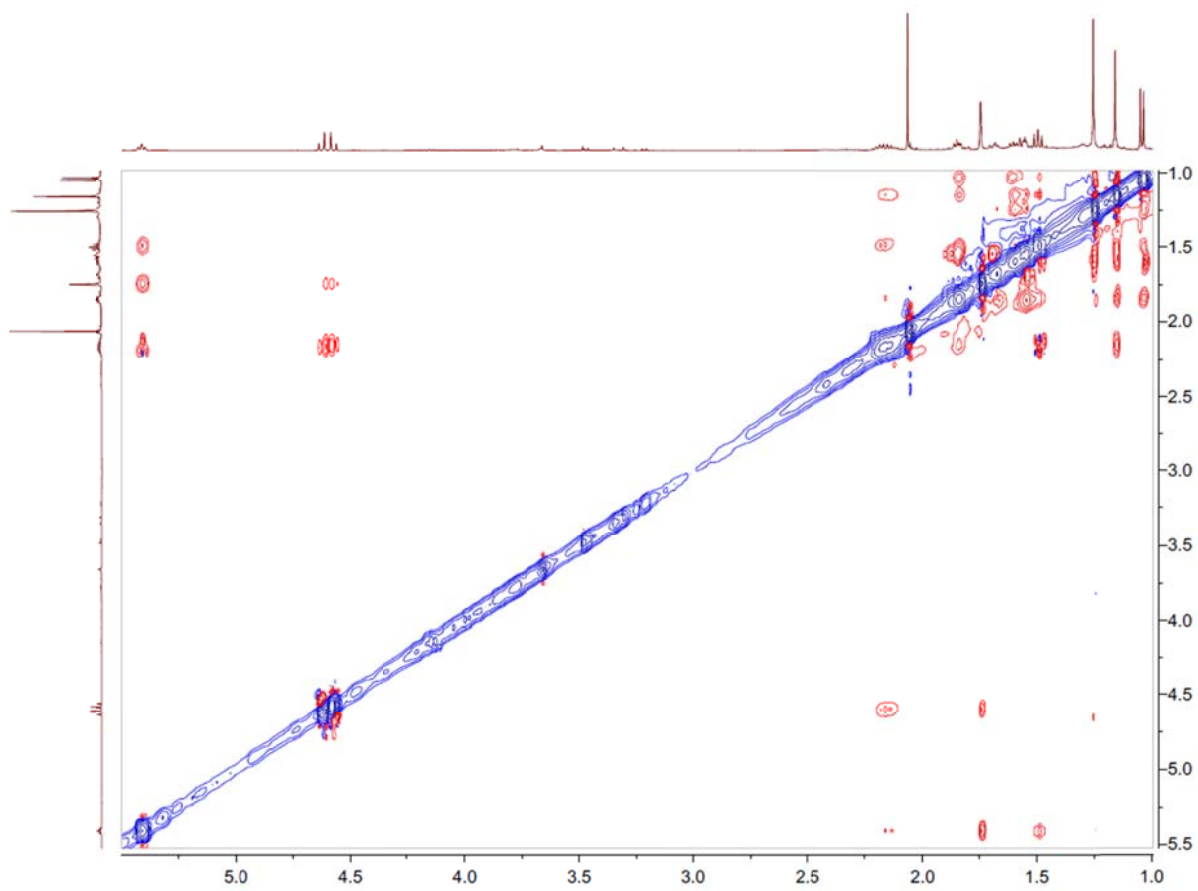

**Figure S48.** NOESY spectrum of compound **7** in  $\text{CDCl}_3$ .

### Single Mass Analysis

Tolerance = 10.0 PPM / DBE: min = -10.0, max = 120.0

Selected filters: None

Monoisotopic Mass, Odd and Even Electron Ions

25 formula(e) evaluated with 1 results within limits (up to 51 closest results for each mass)

Elements Used:

C: 0-200 H: 0-400 O: 2-6

11:09:02 20-Jun-2018

KIB  
M180613EA-03AFAMMA 17 (1.561)  
298.2138

Autospec Premier  
P776  
5.78

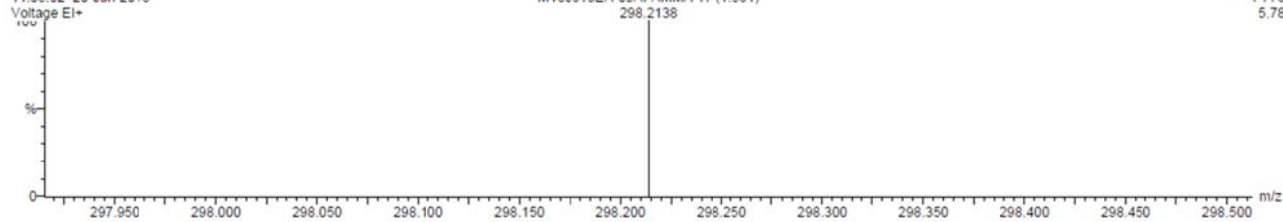

Minimum: -10.0  
Maximum: 200.0 10.0 120.0

| Mass     | Calc. Mass | mDa  | PPM  | DBE | i-FIT     | Formula    |
|----------|------------|------|------|-----|-----------|------------|
| 298.2138 | 298.2144   | -0.6 | -2.0 | 3.0 | 5546025.5 | C17 H30 O4 |

**Figure S49.** HREIMS spectrum of compound 7.
